# Supplementary material for: 4′-C-Trifluoromethyl modified oligodeoxynucleotides: synthesis, biochemical studies, and cellular uptake properties
Source: Royal Society of Chemistry journal article supplement (doi:10.1039/c9ob00765b), 2019-01-01
Supplement: c9ob00765b1.pdf [file c9ob00765b1.pdf]

## Electronic Supplementary Material (ESI)

# 4'-C-Trifluoromethyl Modified Oligodeoxynucleotides: Synthesis, Biochemical Studies, and Cellular Uptake Properties<sup>#,†</sup>

Yifei Zhou,<sup>a</sup> Chuanlong Zang,<sup>a</sup> Huawei Wang,<sup>a</sup> Jiajun Li,<sup>a</sup> Zenghui Cui,<sup>a</sup> Qiang Li,<sup>a</sup> Fengmin Guo,<sup>a</sup> Zhiguo Yan,<sup>b</sup> Xin Wen,<sup>a</sup> Zhen Xi<sup>a</sup> and Chuanzheng Zhou<sup>\*a</sup>

<sup>a</sup> State Key Laboratory of Elemento-Organic Chemistry and Department of Chemical Biology, College of Chemistry, Nankai University, Tianjin 300071, China

<sup>b</sup> Key Laboratory for Green Chemical Process of Ministry of Education, Hubei Key Laboratory of Novel Chemical Reactor and Green Chemical Technology, School of Chemical Engineering and Pharmacy, Wuhan Institute of Technology, Wuhan 430073, China.

\* Chuanzheng Zhou. [chuanzheng.zhou@nankai.edu.cn](mailto:chuanzheng.zhou@nankai.edu.cn)

### TABLE OF CONTENTS

Figure S1. NMR spectra of new compounds. (Page S2)

Figure S2. MS spectra of synthesized ODNs. (Pages S29)

Figure S3. Melting Curves of ODN/DNA and ODN/RNA duplexes. (Page S33)

Figure S4. Circular dichroism spectroscopy of ODNs/DNA duplexes and ODNs/RNA duplexes. (Page S34)

Figure S5. Flow Cytometry analysis of cell permeability of ODNs. (Page S35)

**Figure S1. NMR Spectra of new compounds.**

(A)  $^1\text{H}$  NMR spectrum of **2** (in  $\text{CDCl}_3$ ):

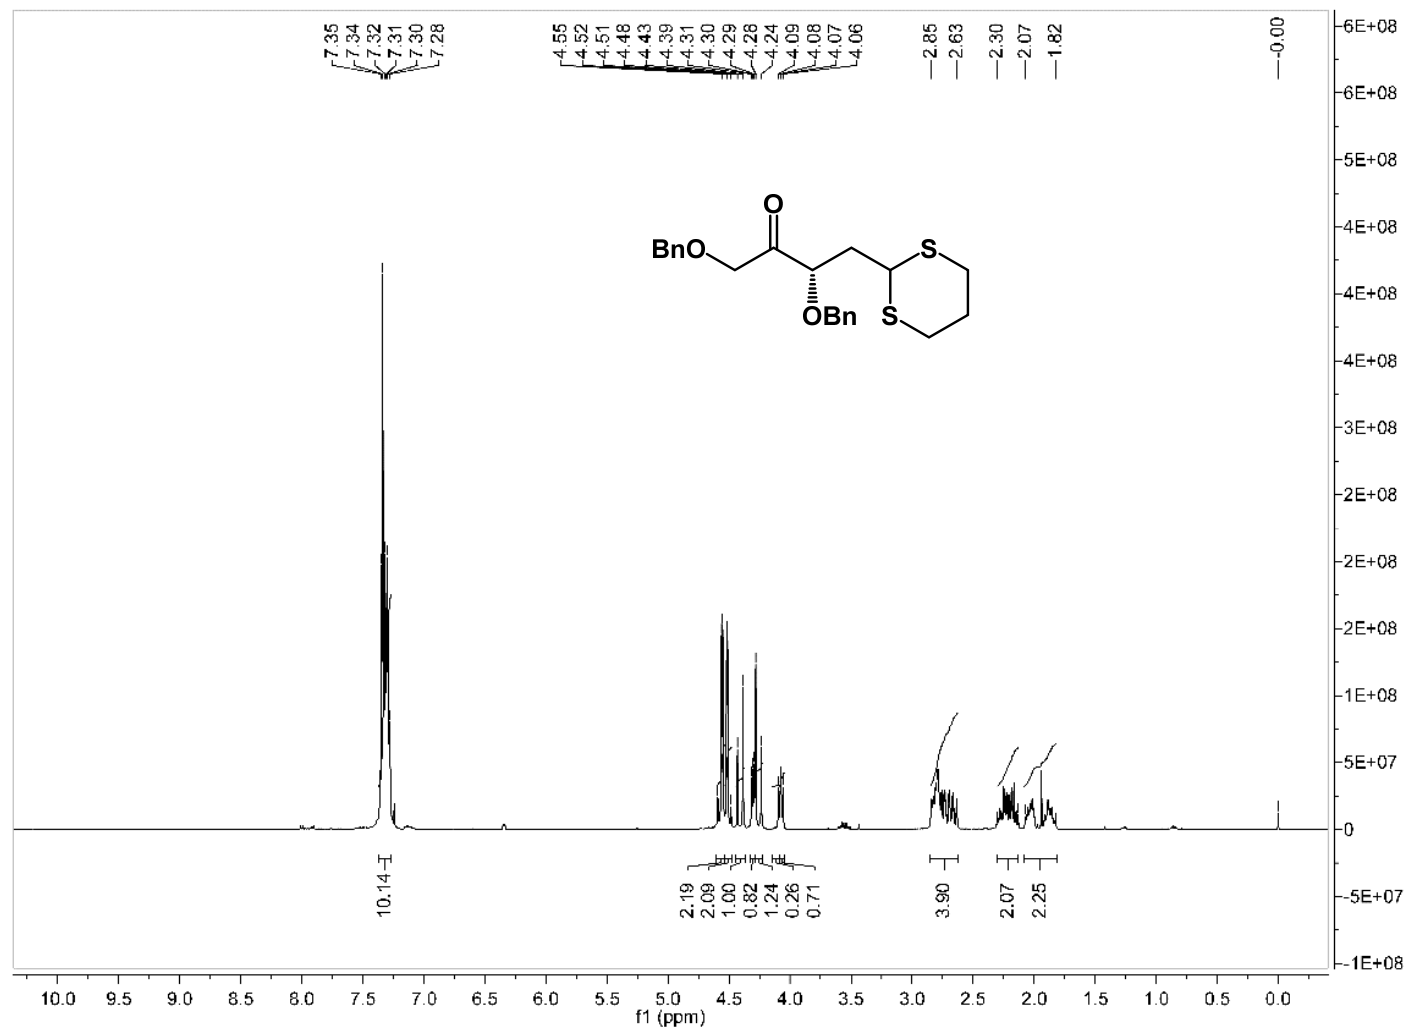

(B)  $^{13}\text{C}$  NMR spectrum of **2** (in  $\text{CDCl}_3$ ):

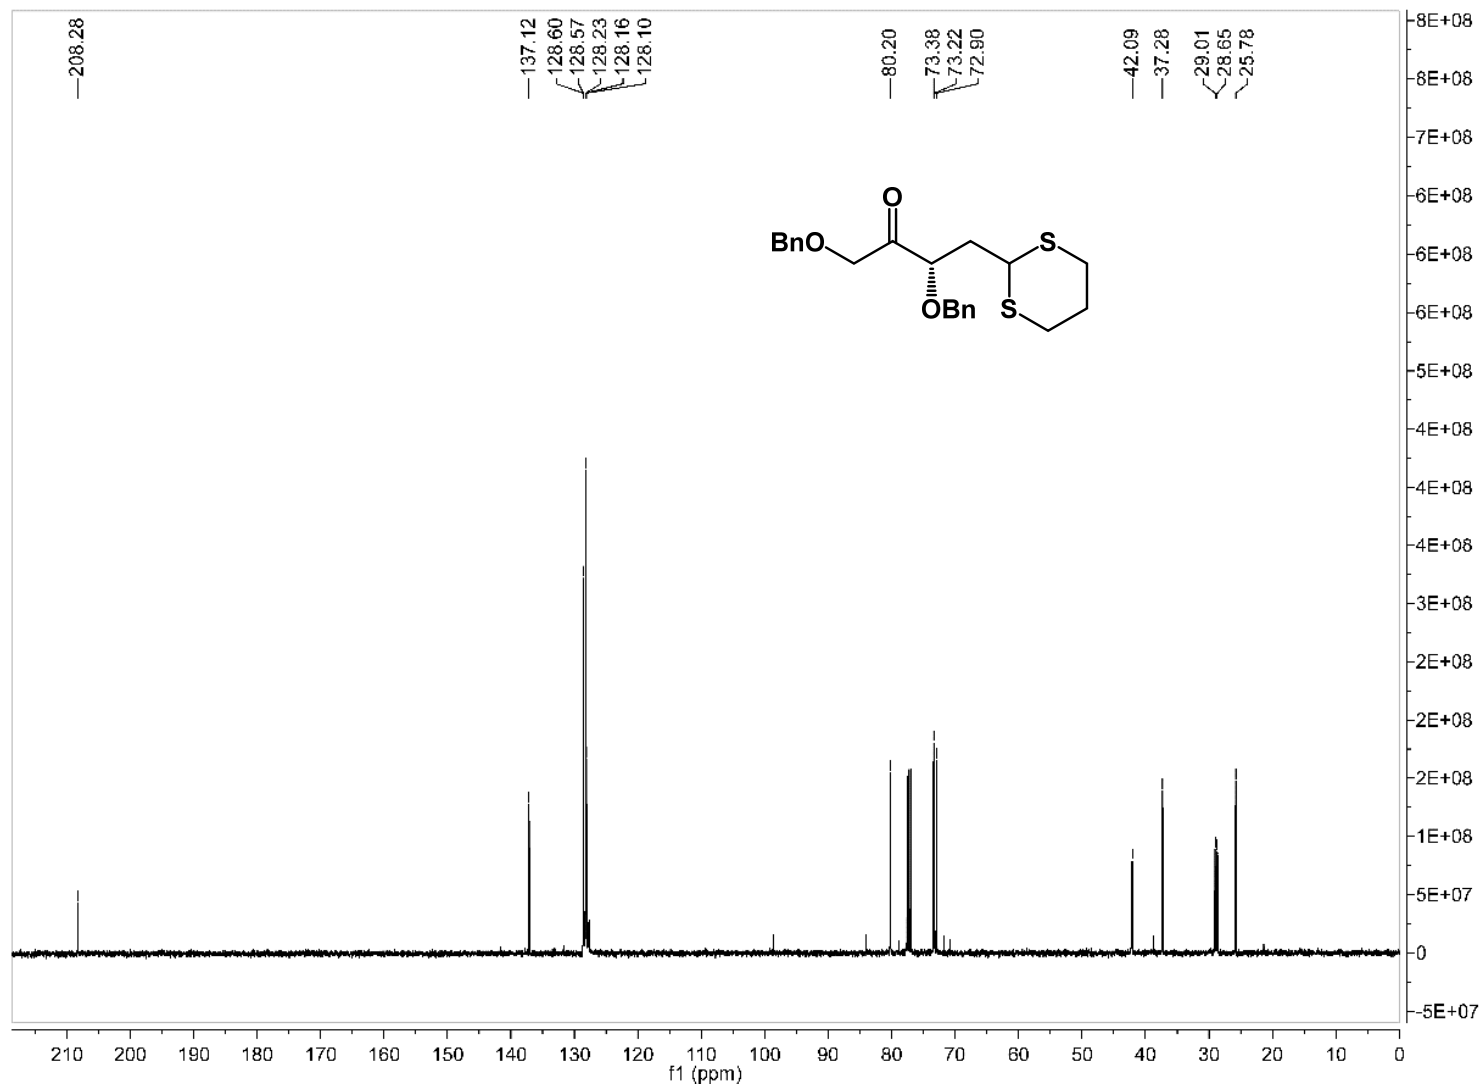

(C) <sup>1</sup>H NMR spectrum of **3b** (in CDCl<sub>3</sub>):

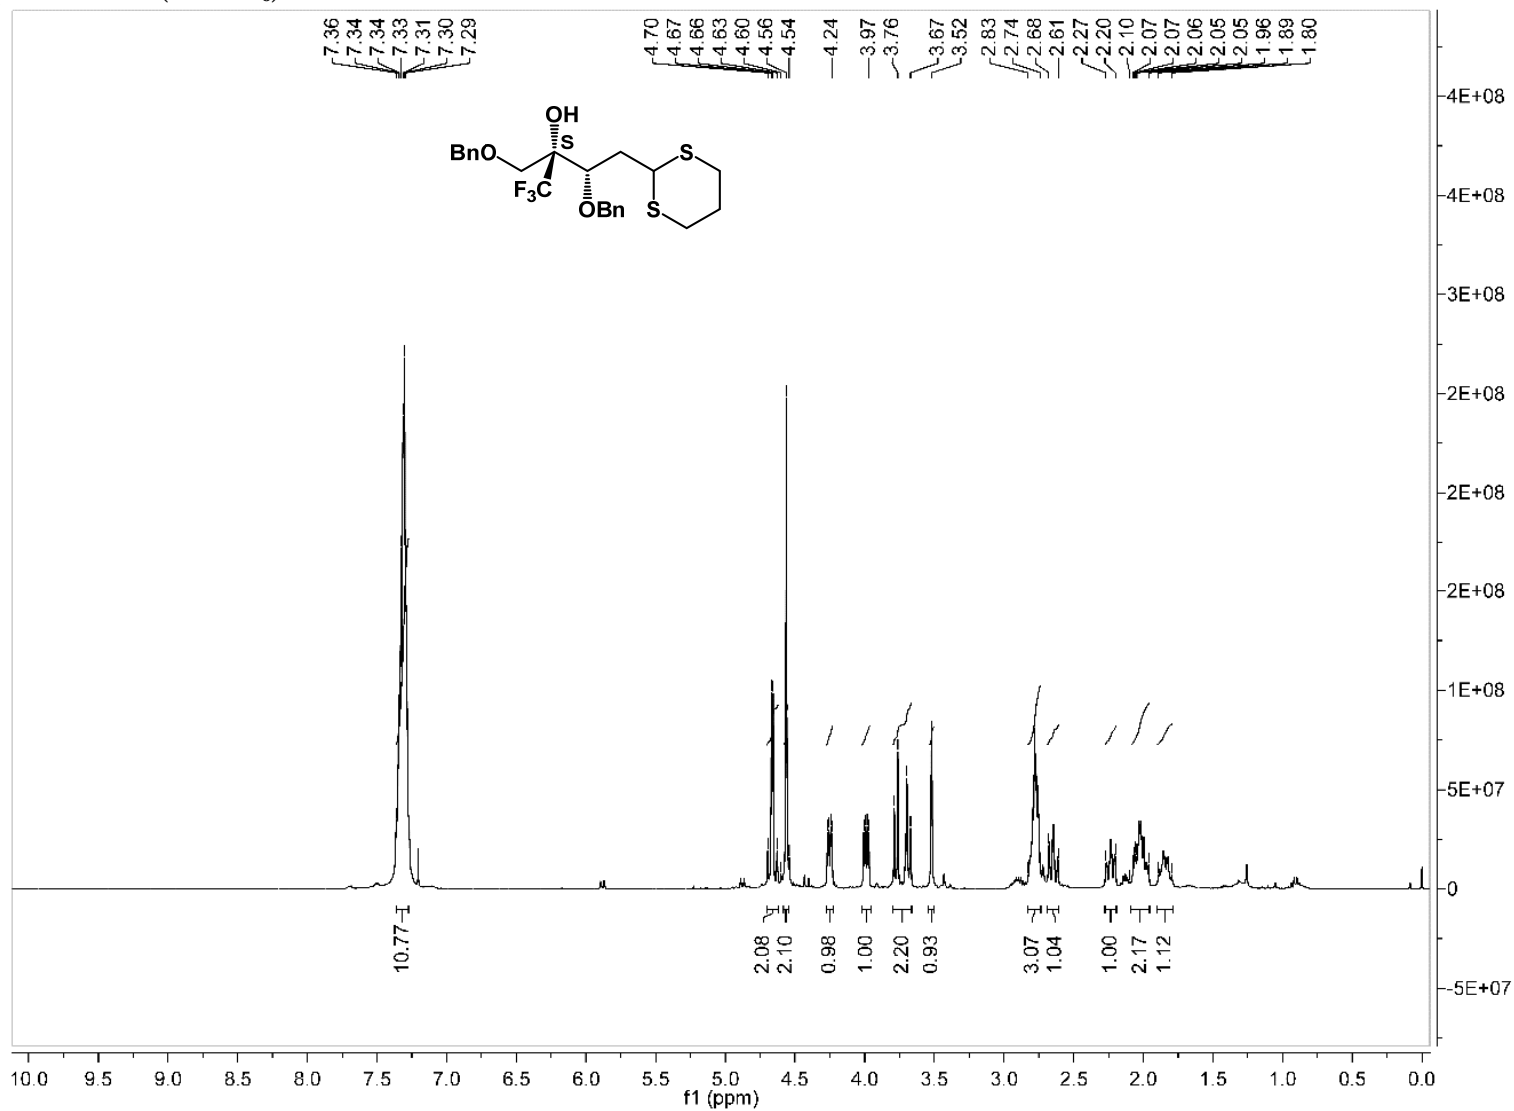

(D)  $^{13}\text{C}$  NMR spectrum of **3b** (in  $\text{CDCl}_3$ ):

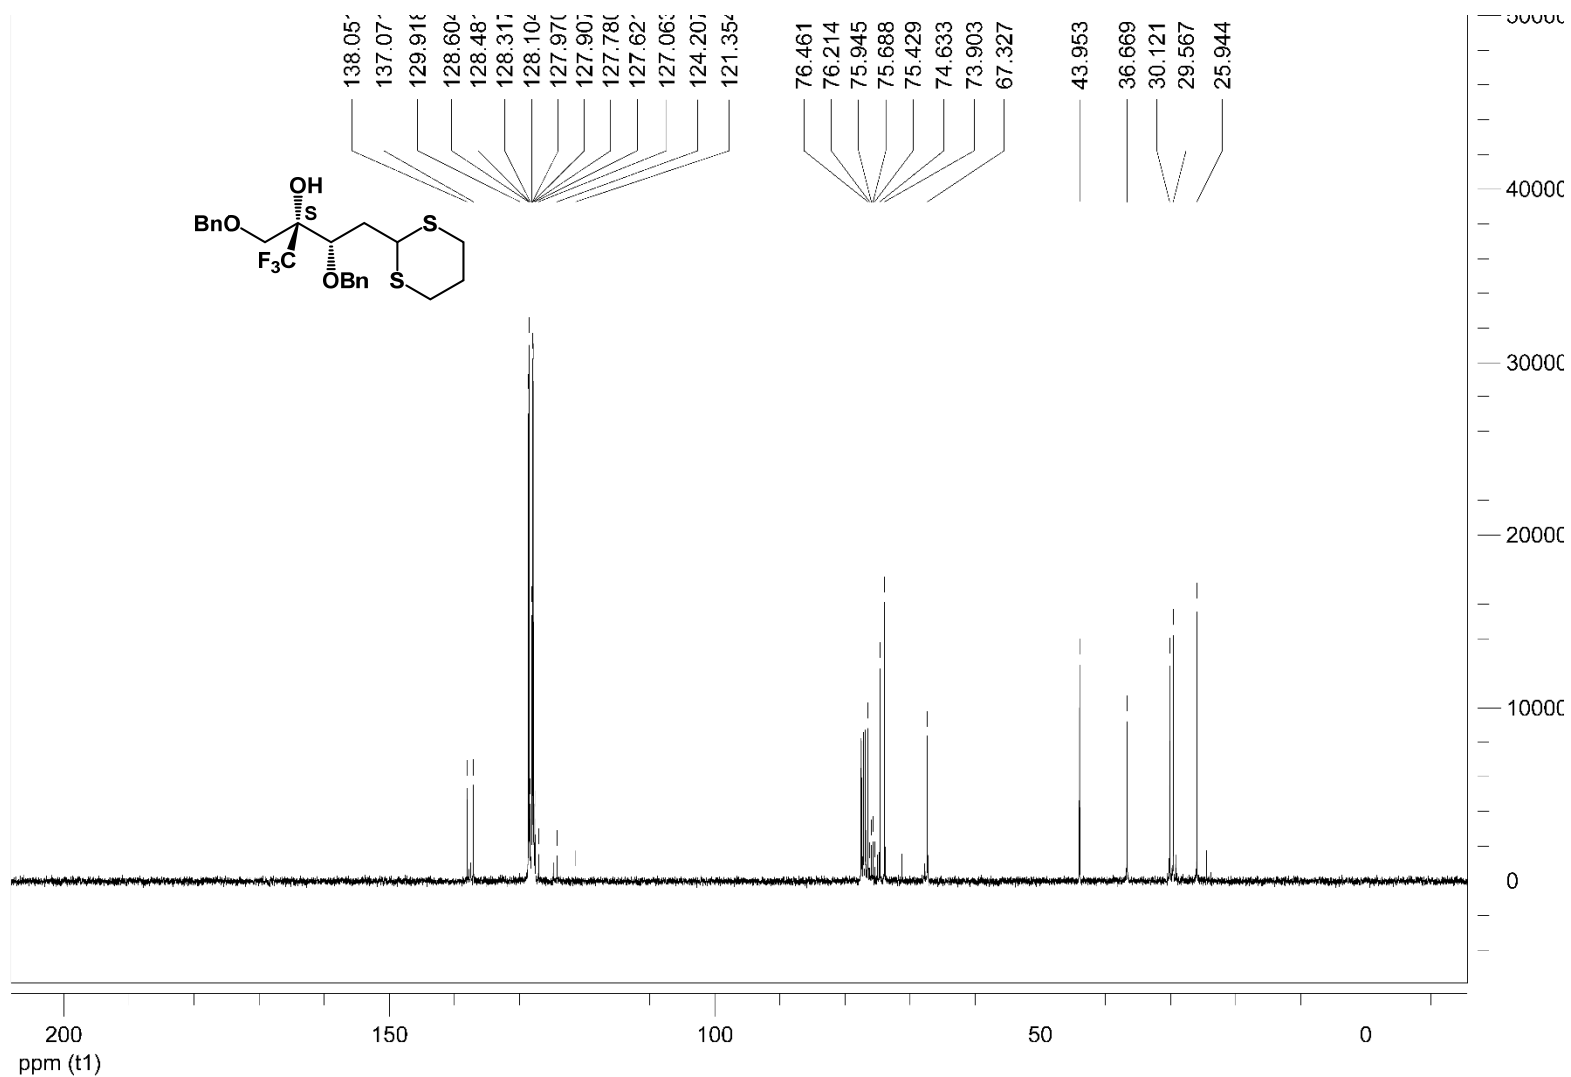

(E)  $^1\text{H}$  NMR spectrum of **3a** (in  $\text{CDCl}_3$ ):

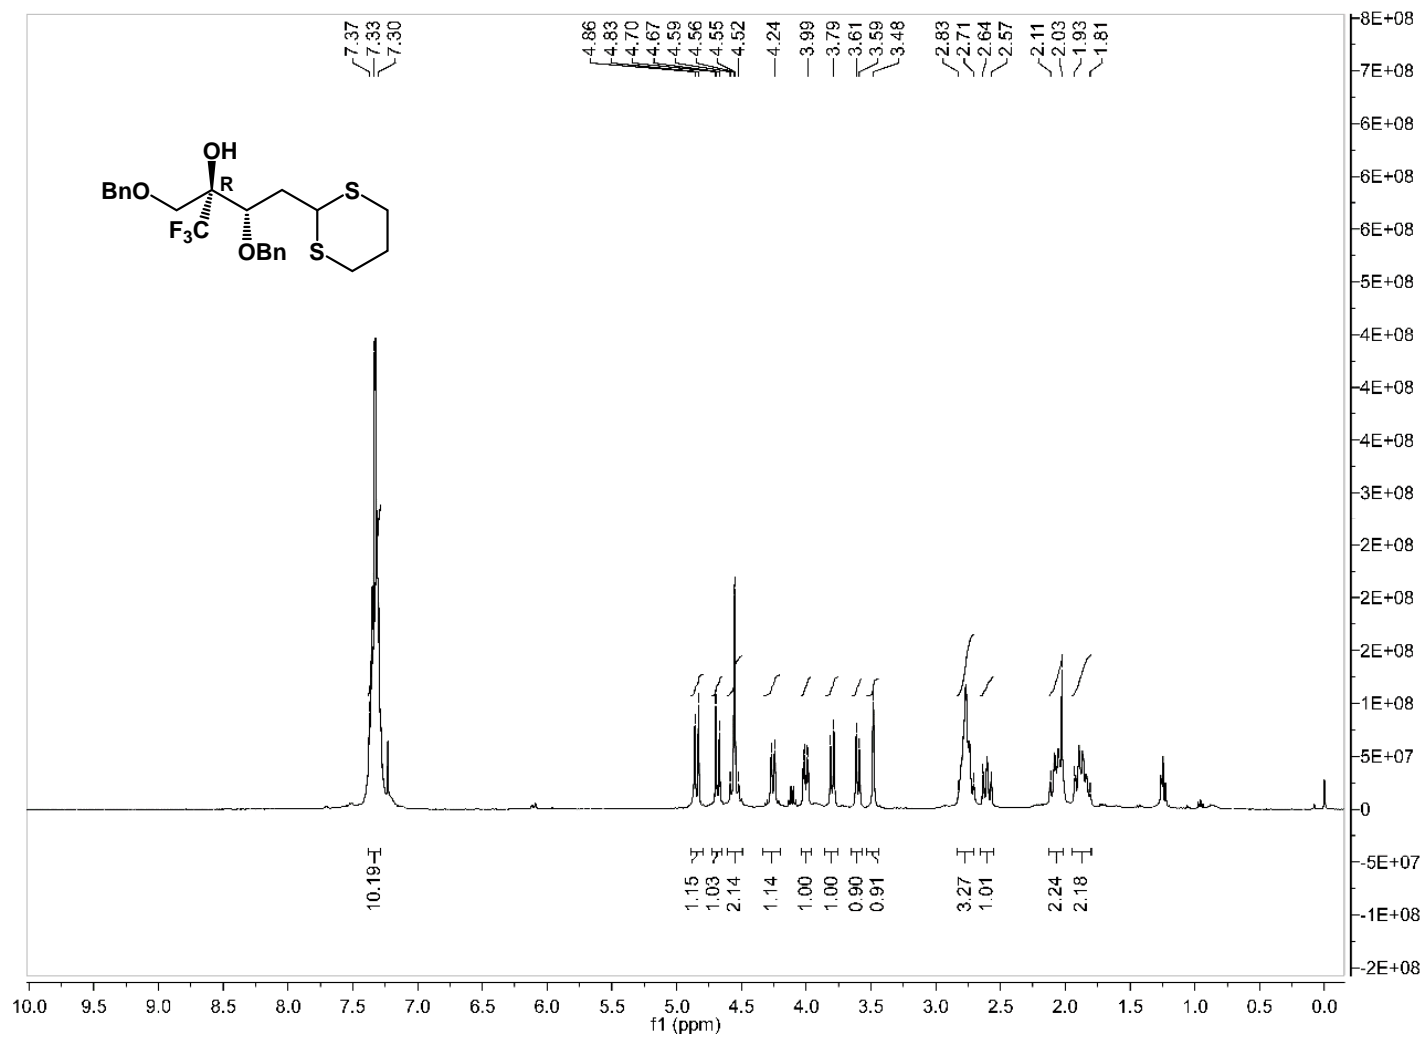

(F)  $^{13}\text{C}$  NMR spectrum of 3a (in  $\text{CDCl}_3$ ):

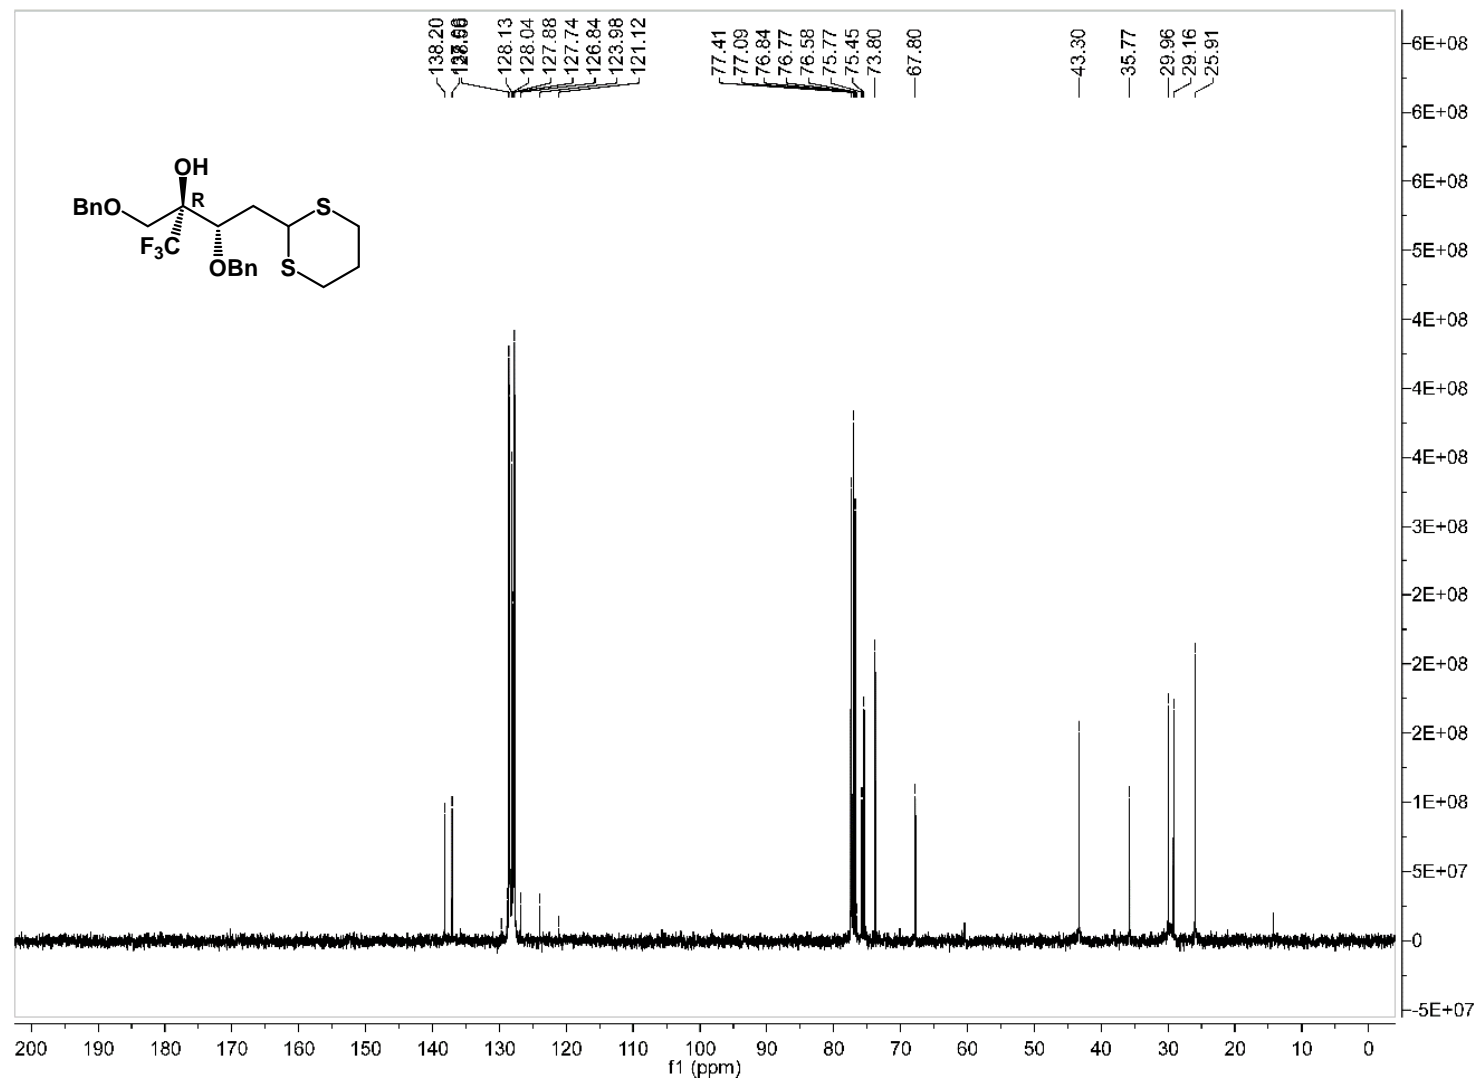

(G)  $^1\text{H}$  NMR spectrum of 4 (in  $\text{CDCl}_3$ ):

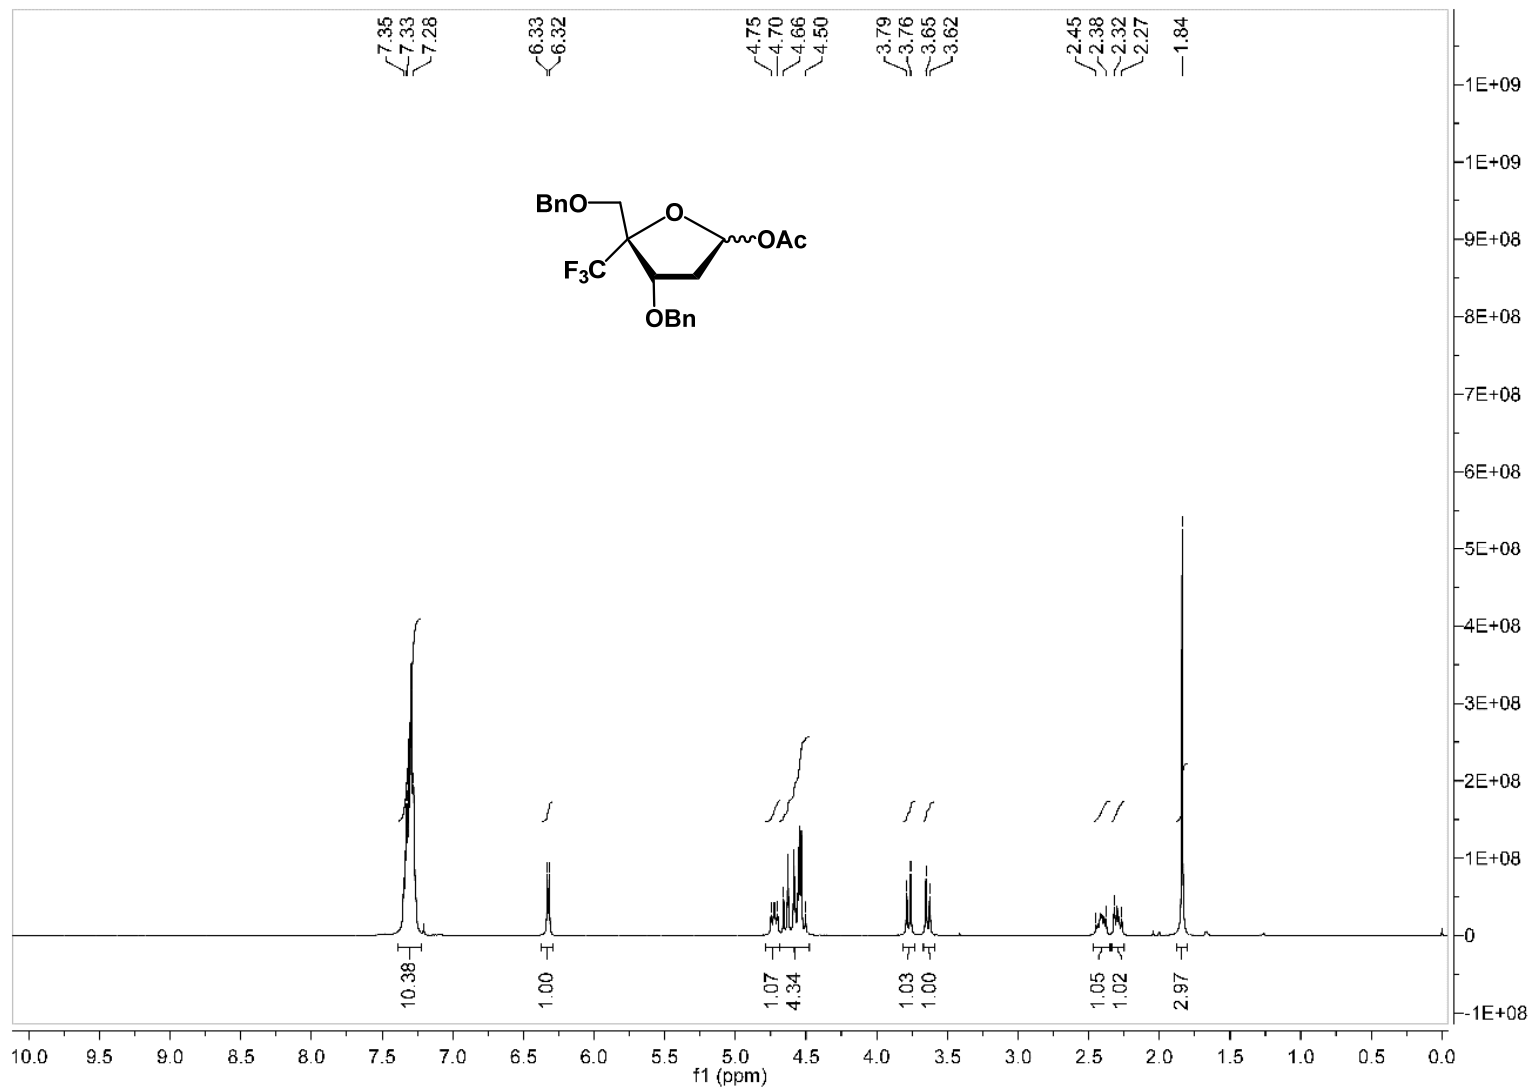



(H)  $^{13}\text{C}$  NMR spectrum of 4 (in  $\text{CDCl}_3$ ):

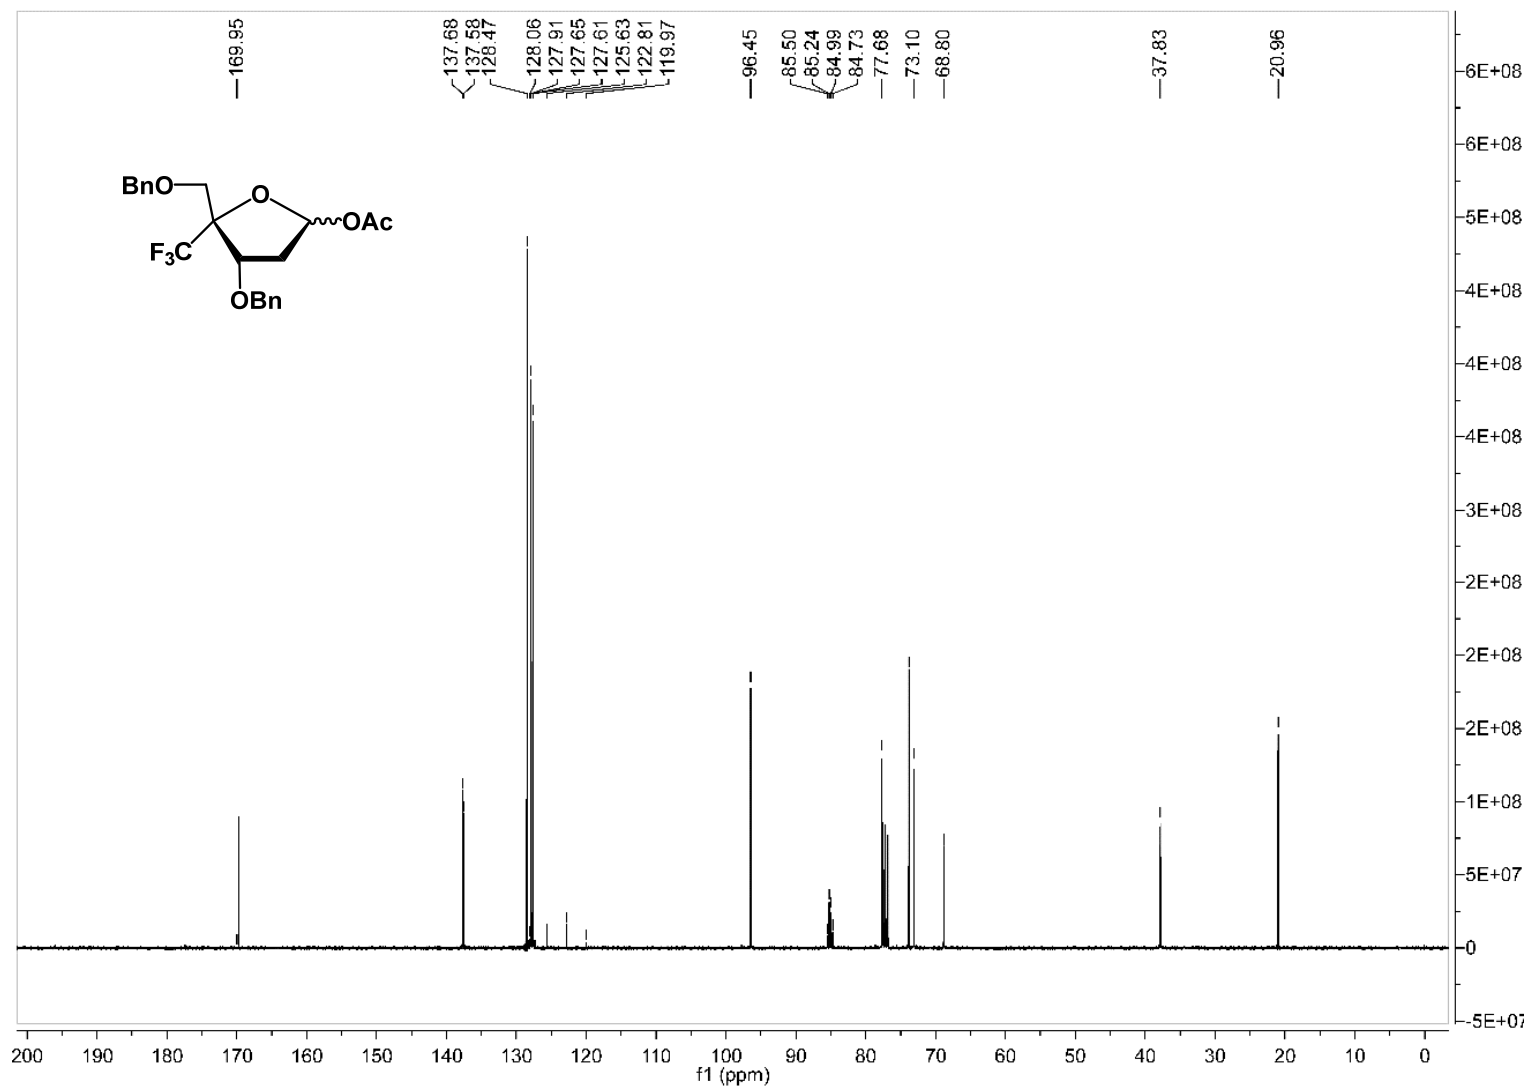

(I)  $^1\text{H}$  NMR spectrum of **5a** (in  $\text{CDCl}_3$ ):

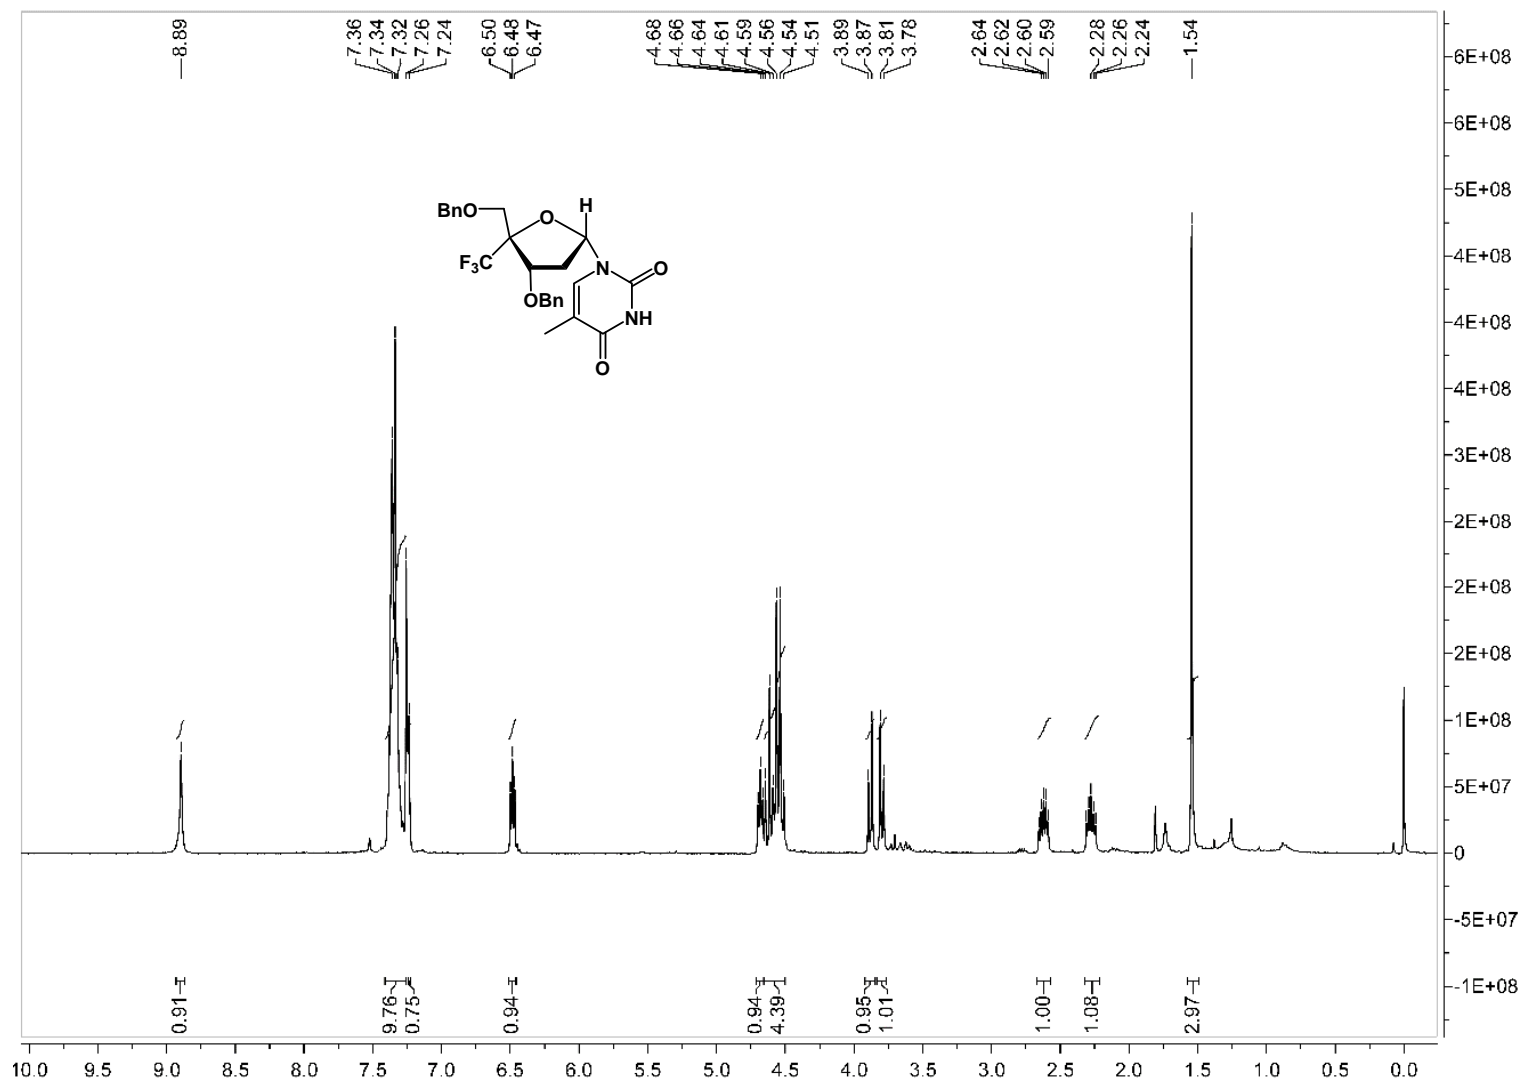

(J)  $^{13}\text{C}$  NMR spectrum of **5a** (in  $\text{CDCl}_3$ ):

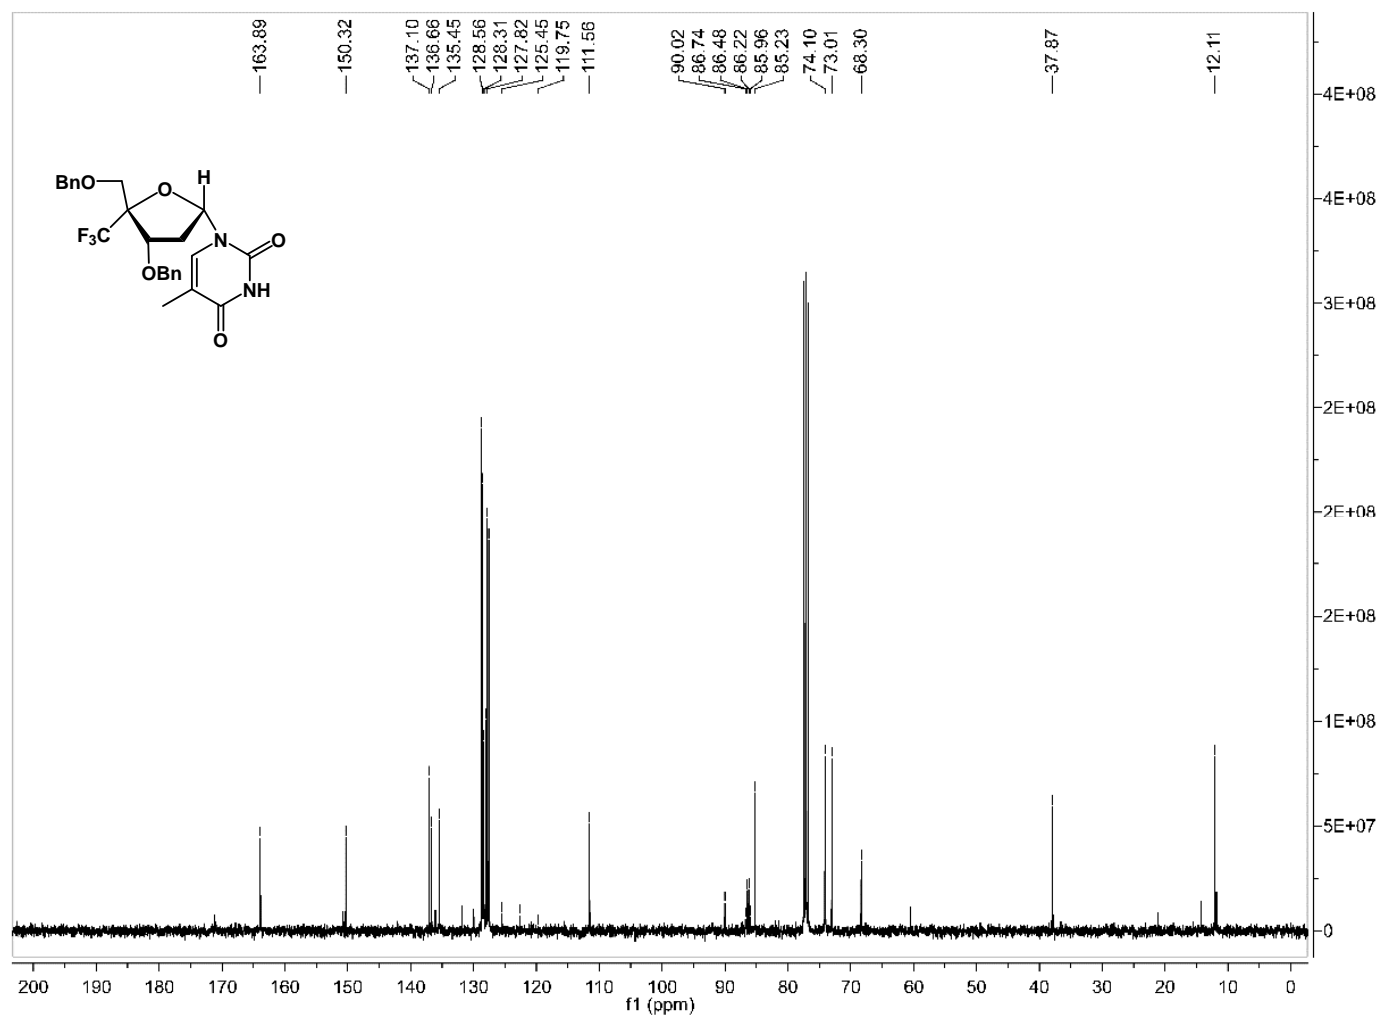

(K) NOESY NMR spectrum of 5a (in CDCl<sub>3</sub>):

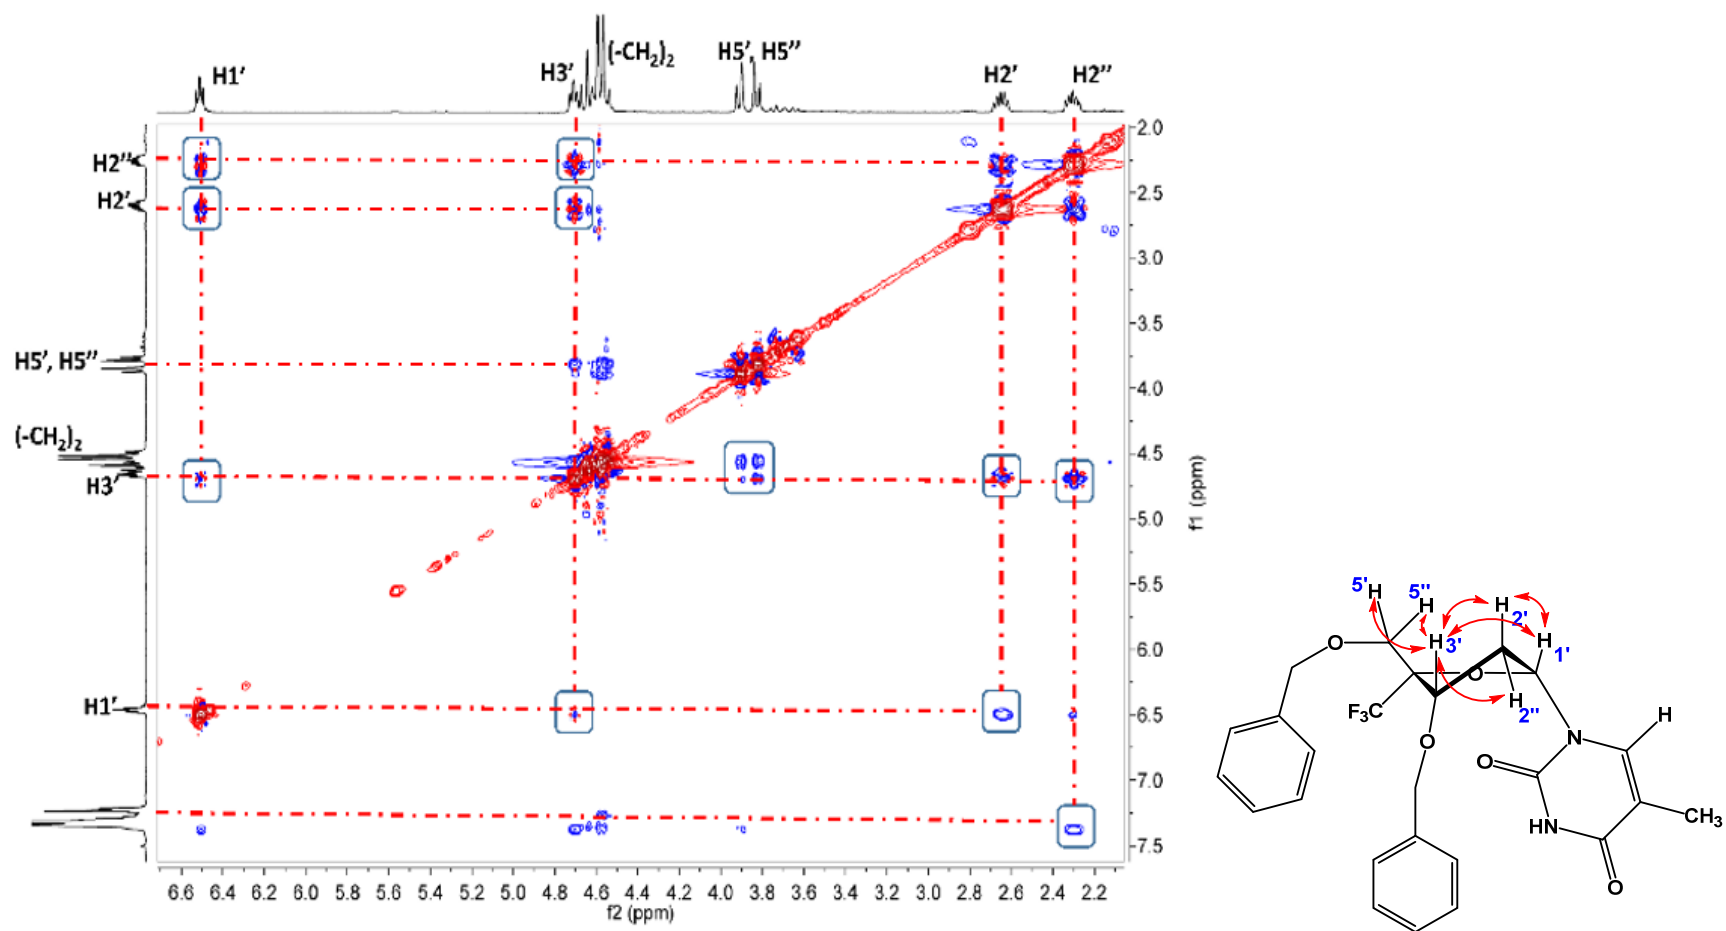

(L) <sup>1</sup>H NMR spectrum of **5b** (in CDCl<sub>3</sub>):

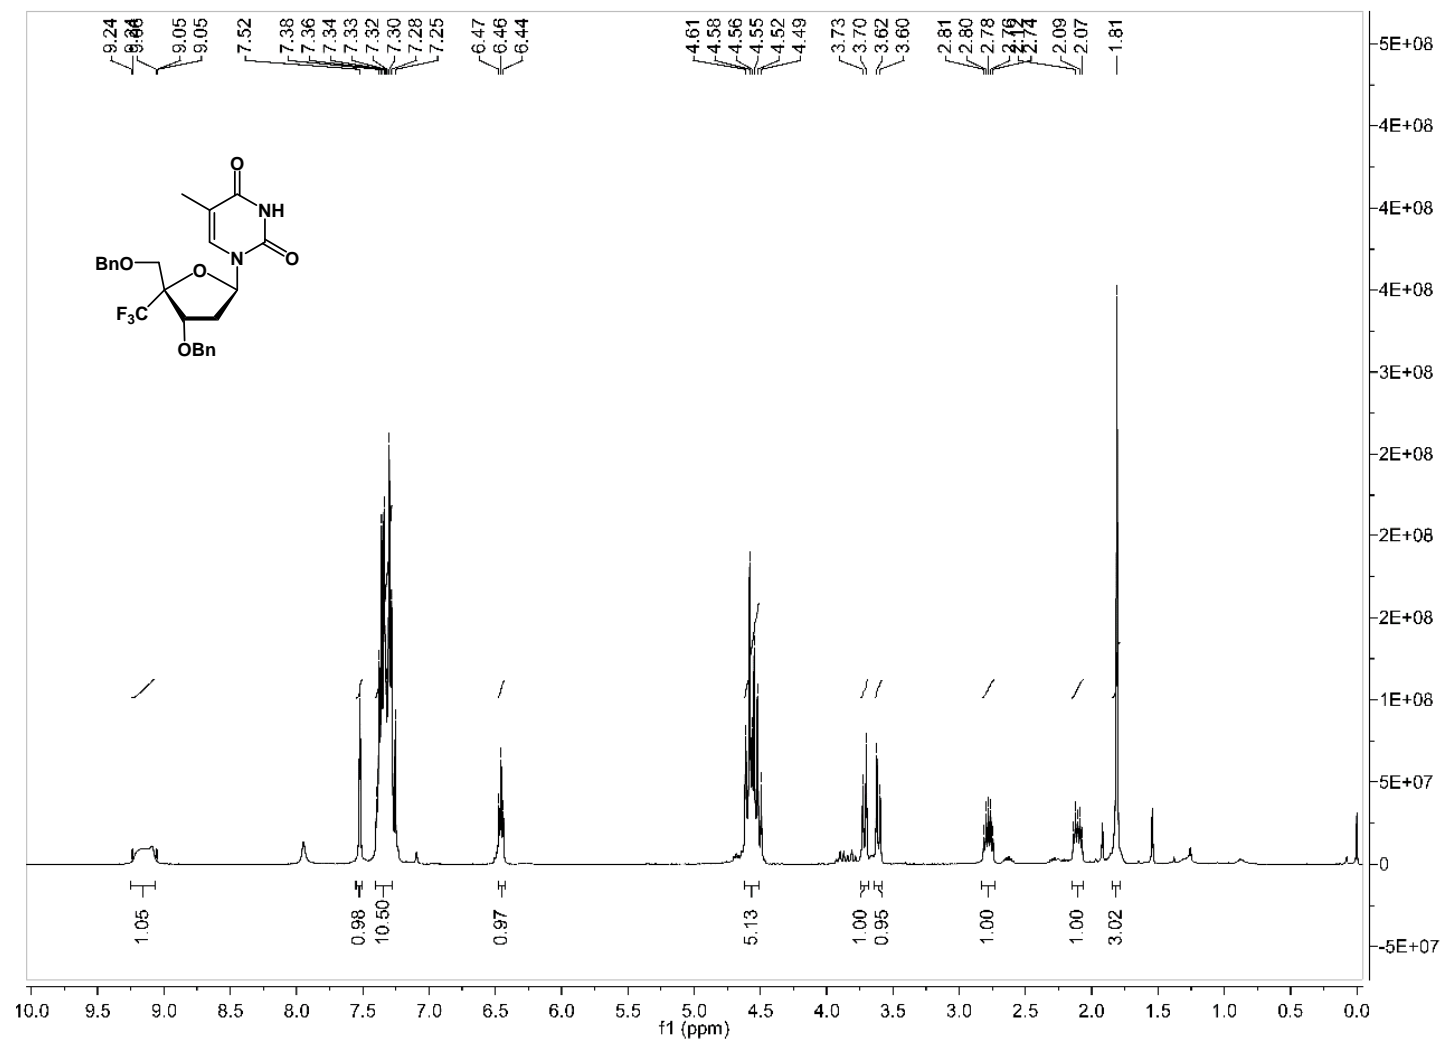

(M)  $^{13}\text{C}$  NMR spectrum of **5b** (in  $\text{CDCl}_3$ ).

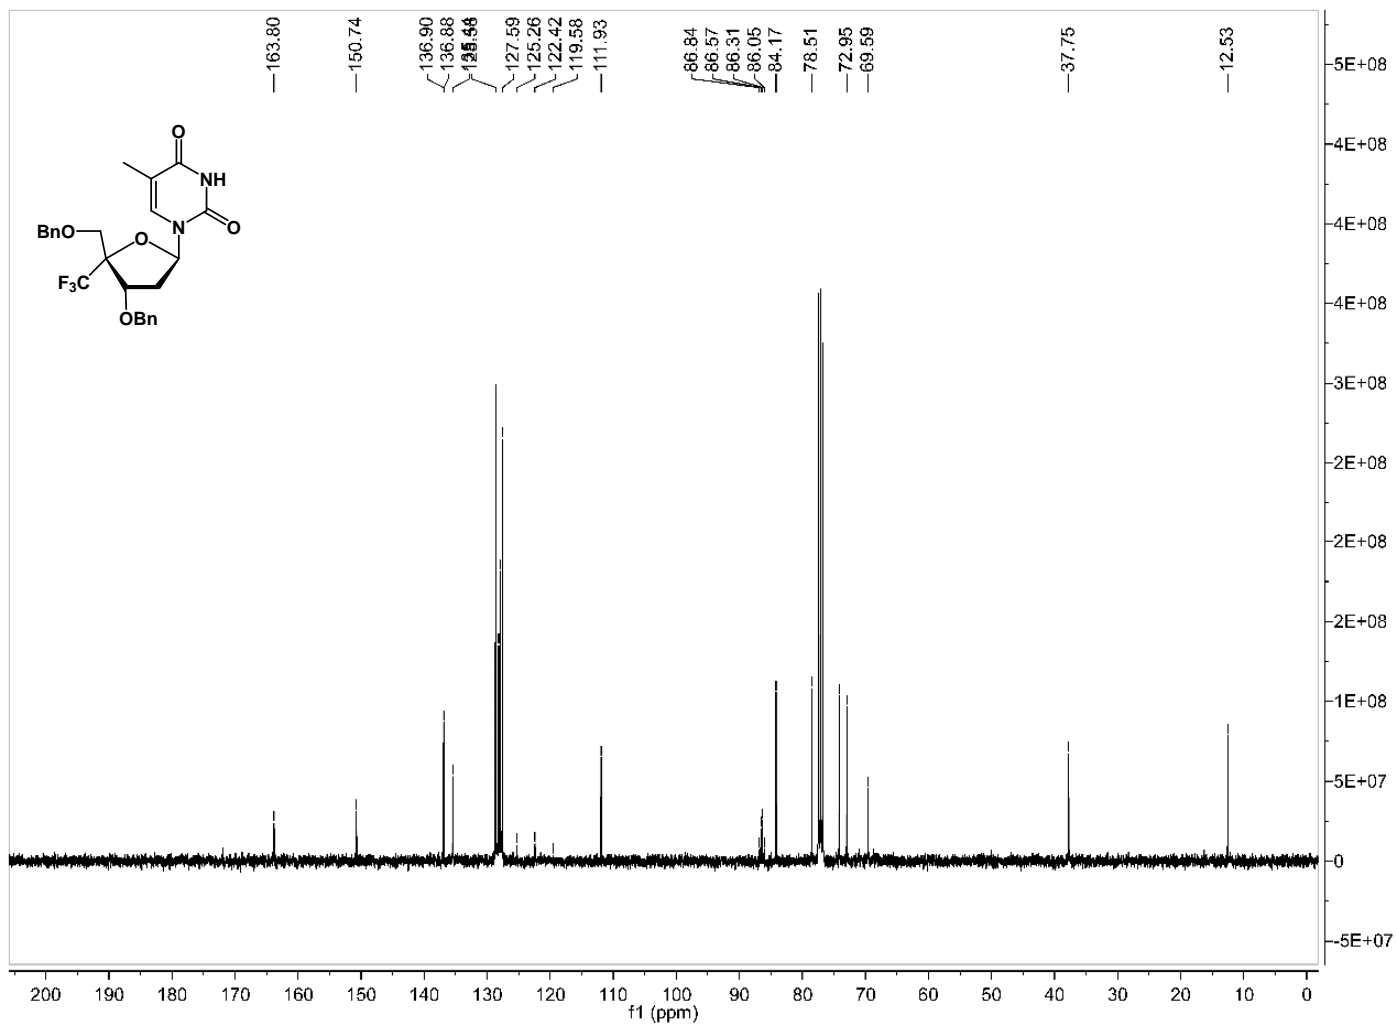

(N) NOESY spectrum of **5b** (in CDCl<sub>3</sub>):

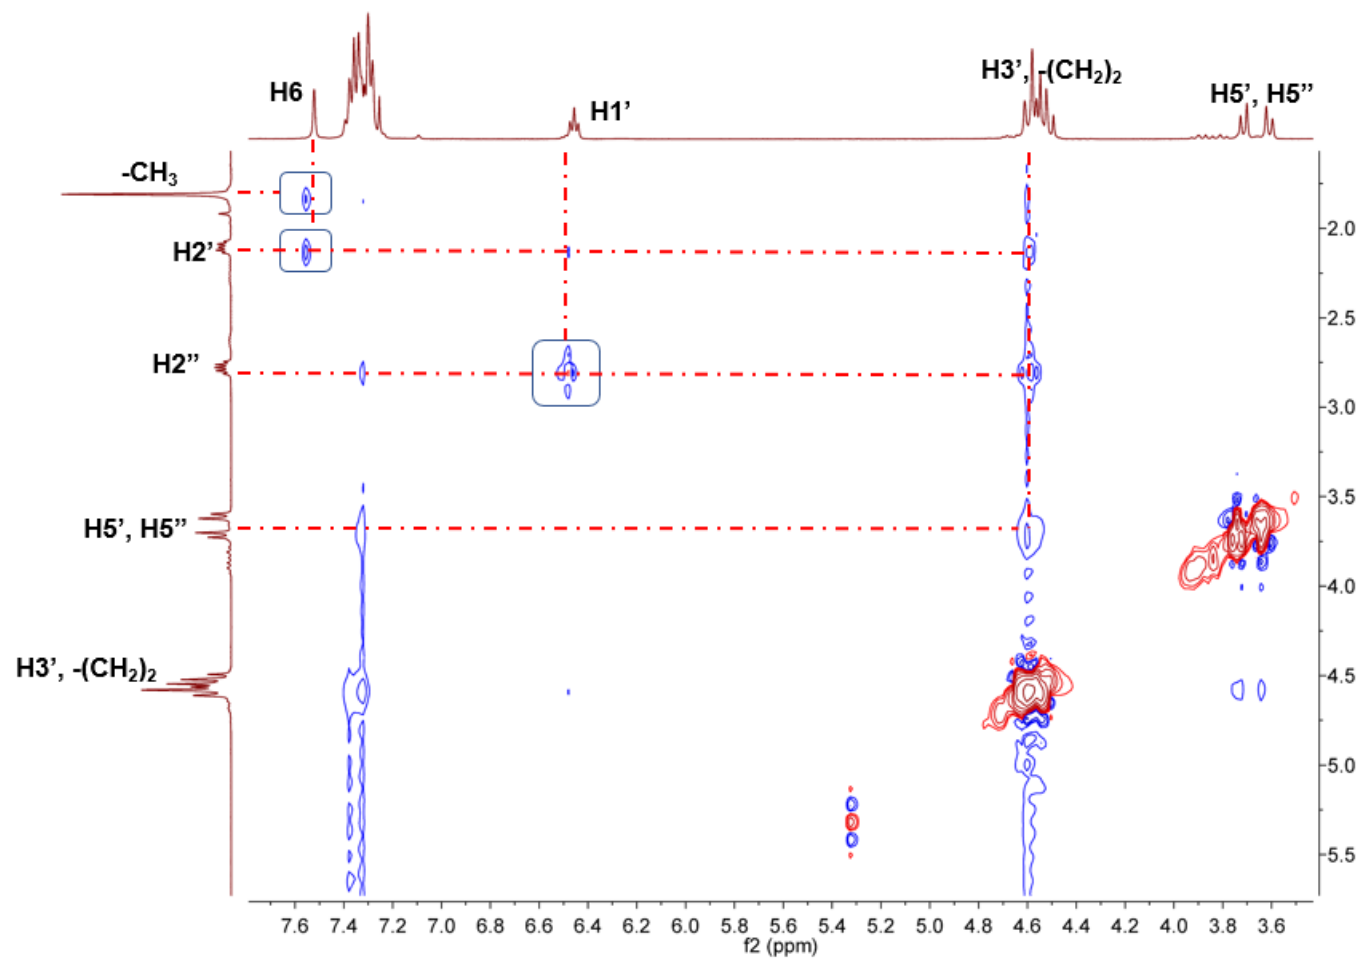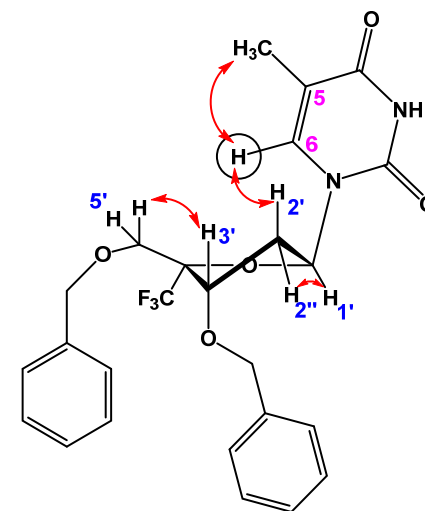

(O)  $^1\text{H}$  NMR spectrum of 6 in  $d_6$ -DMSO:

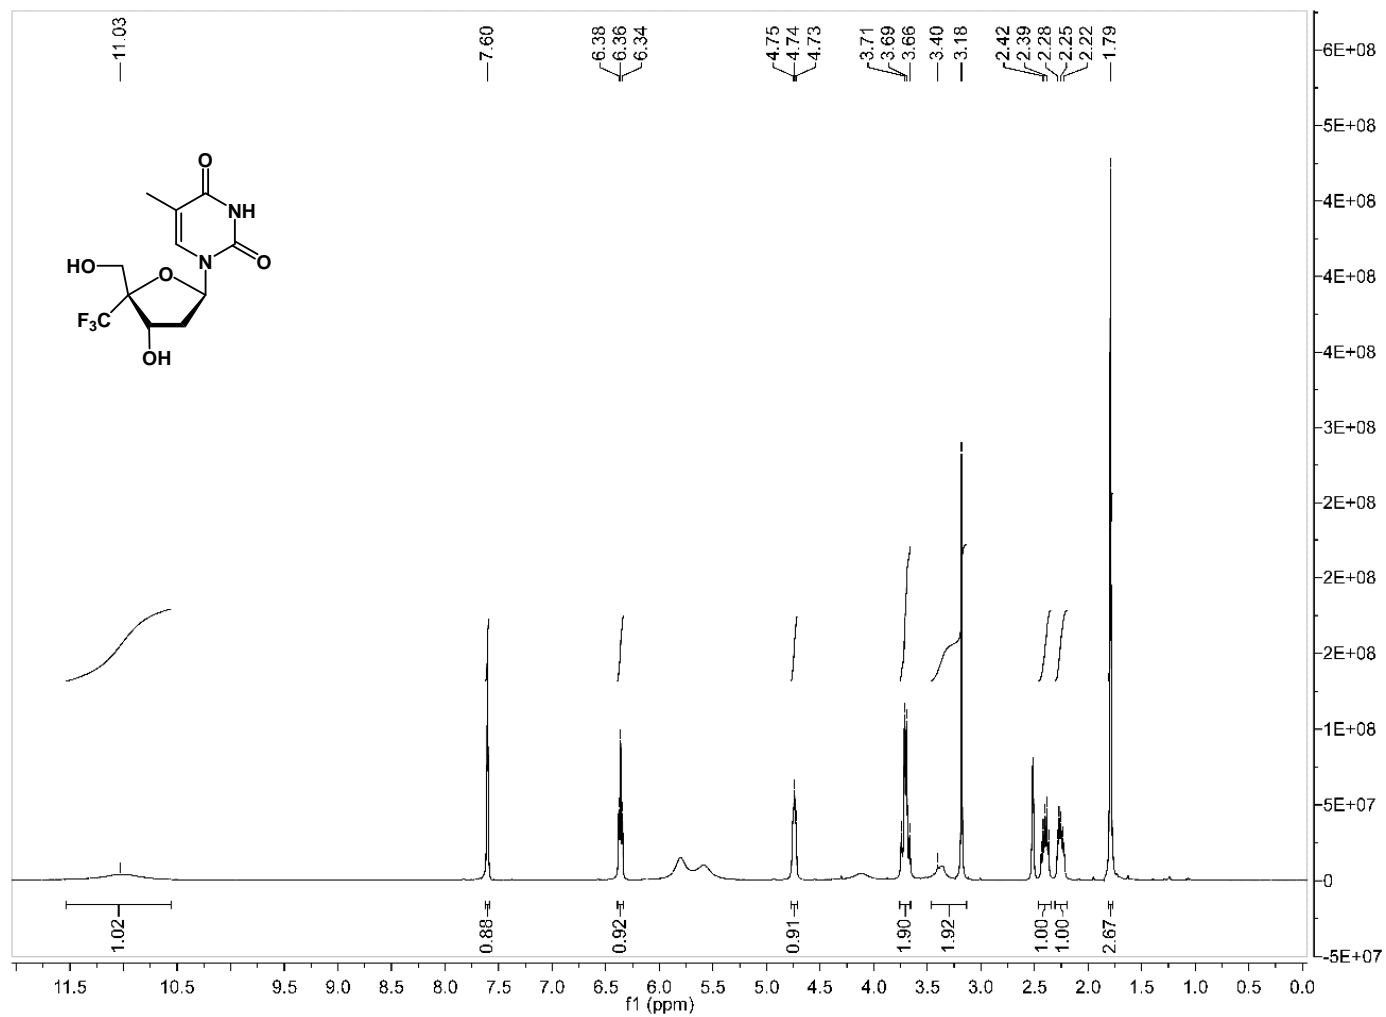



<sup>1</sup>H NMR spectrum of 6 in CD<sub>3</sub>OD:

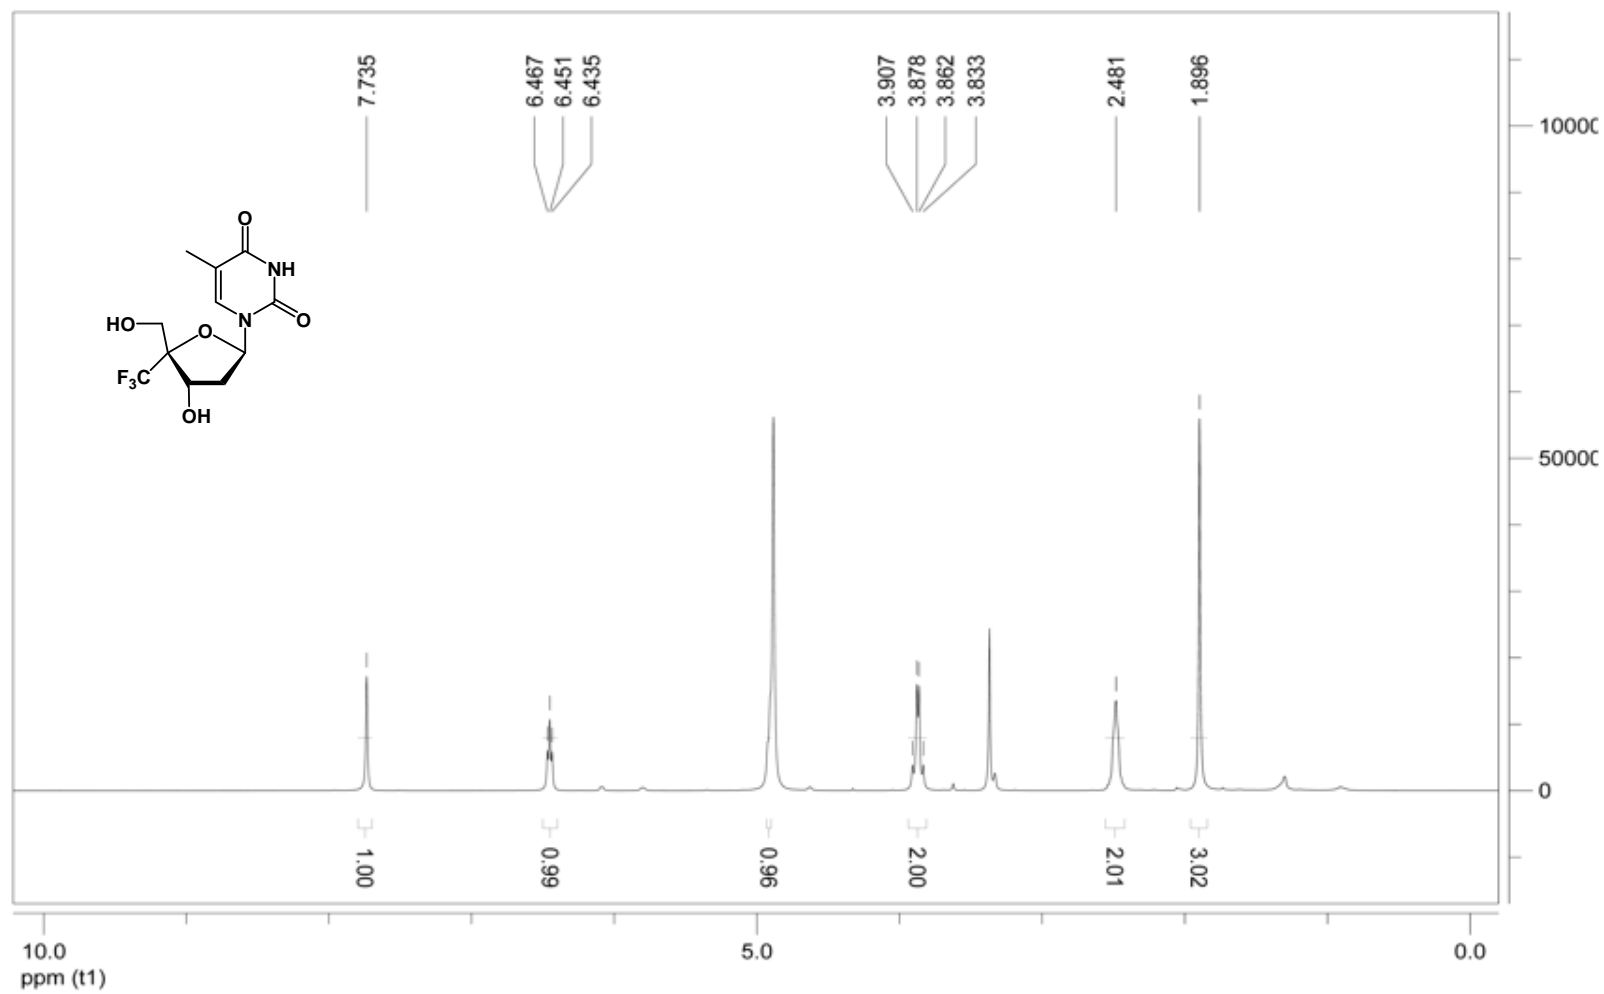

(P)  $^{13}\text{C}$  NMR spectrum of 6 in  $d_6$ -DMSO:

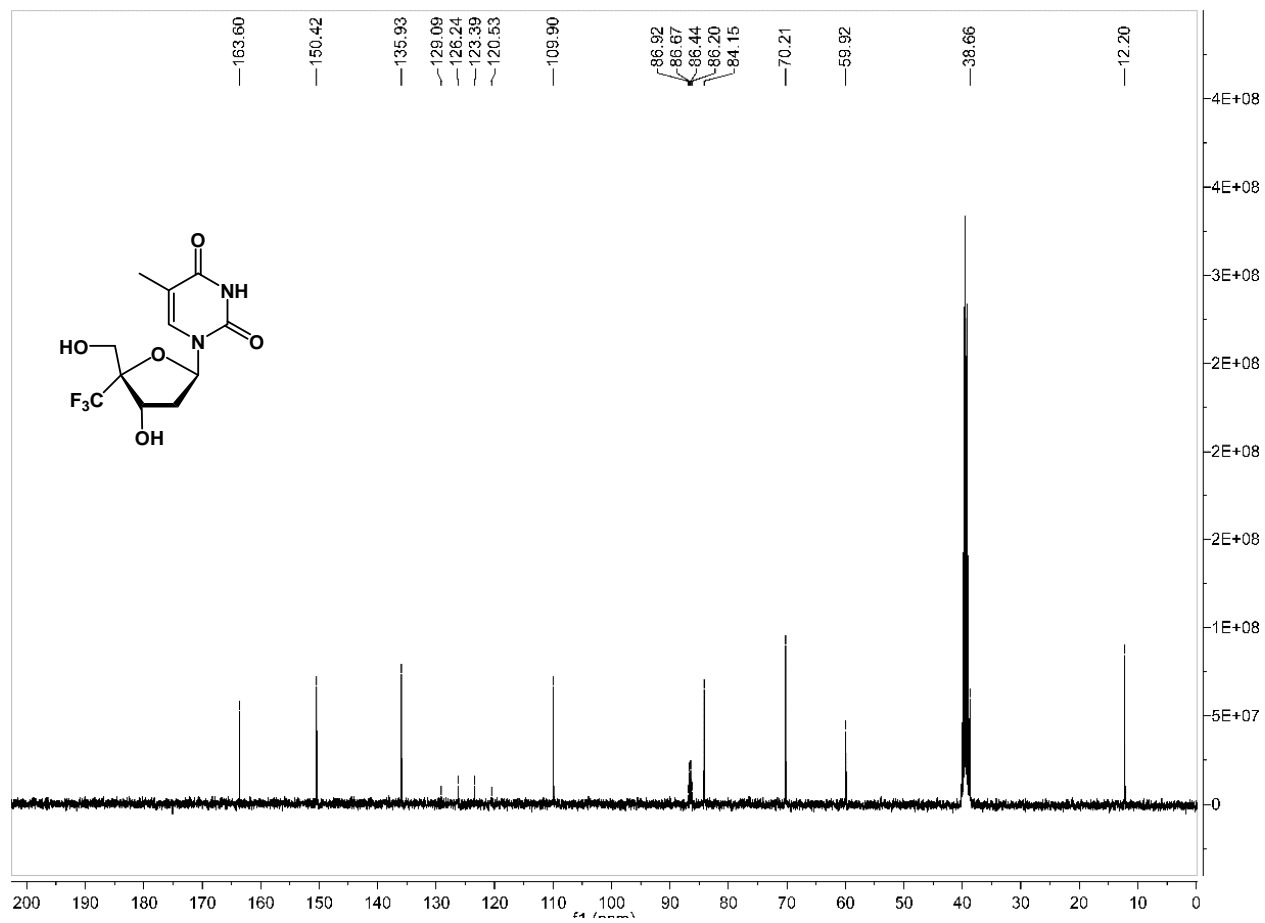

<sup>13</sup>C NMR spectrum of 6 in CD<sub>3</sub>OD:

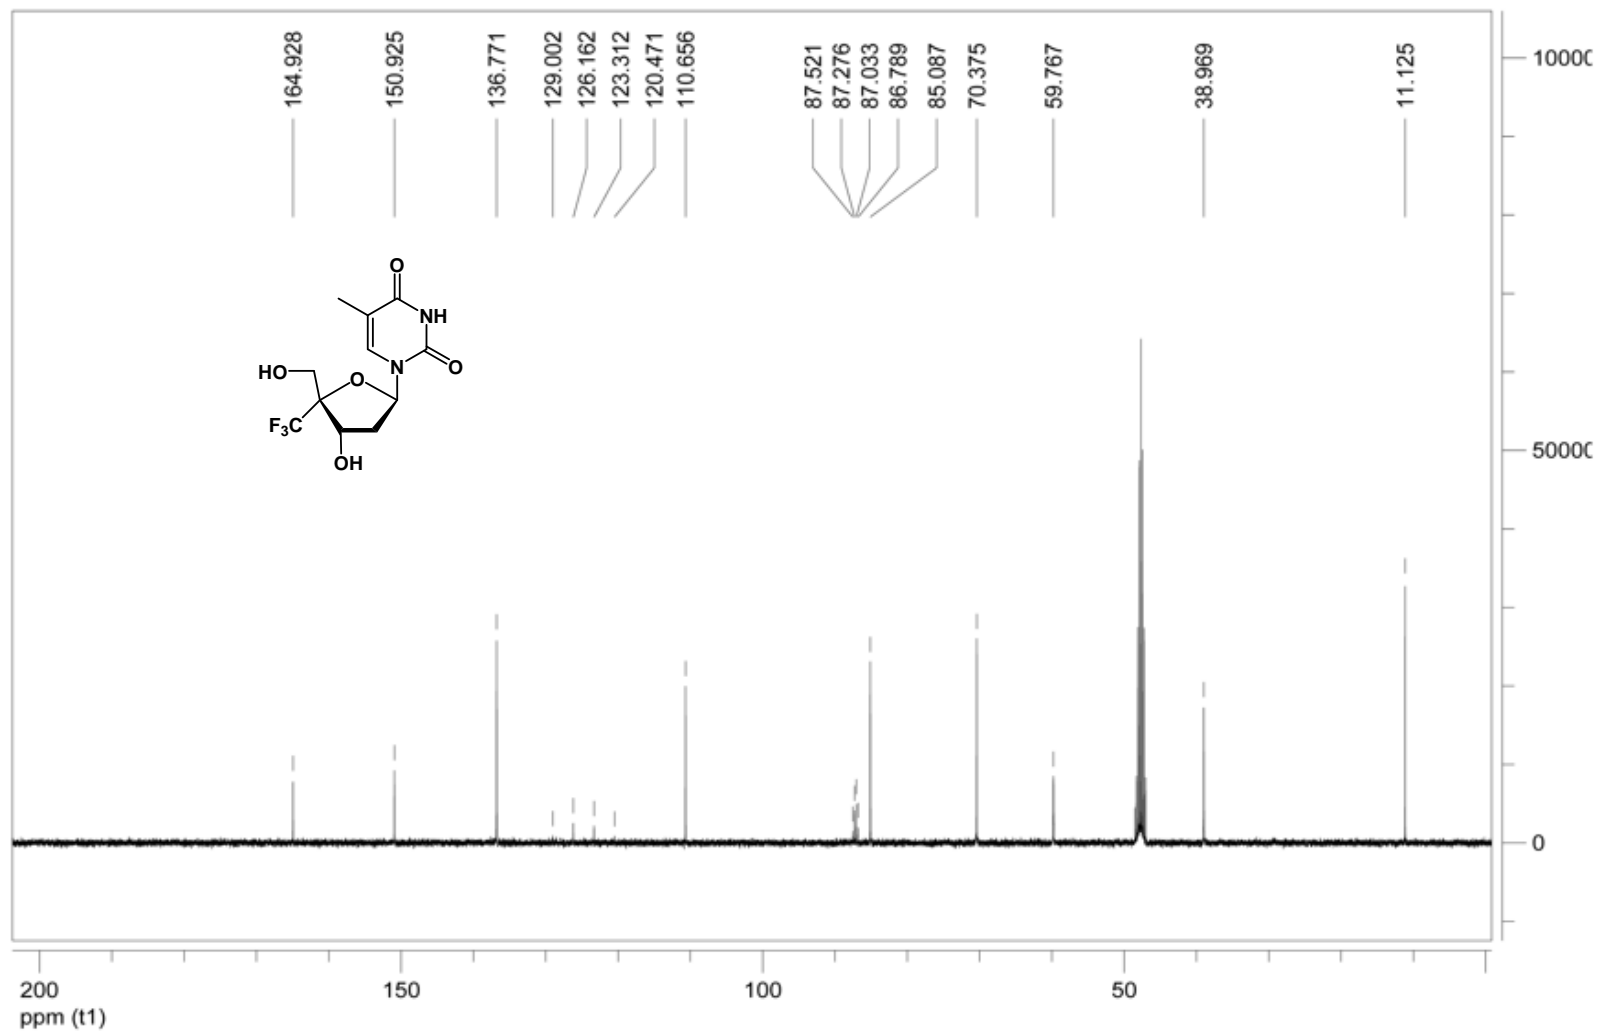

(Q)  $^{19}\text{F}$  NMR spectrum of 6 (in  $d_6$ -DMSO):

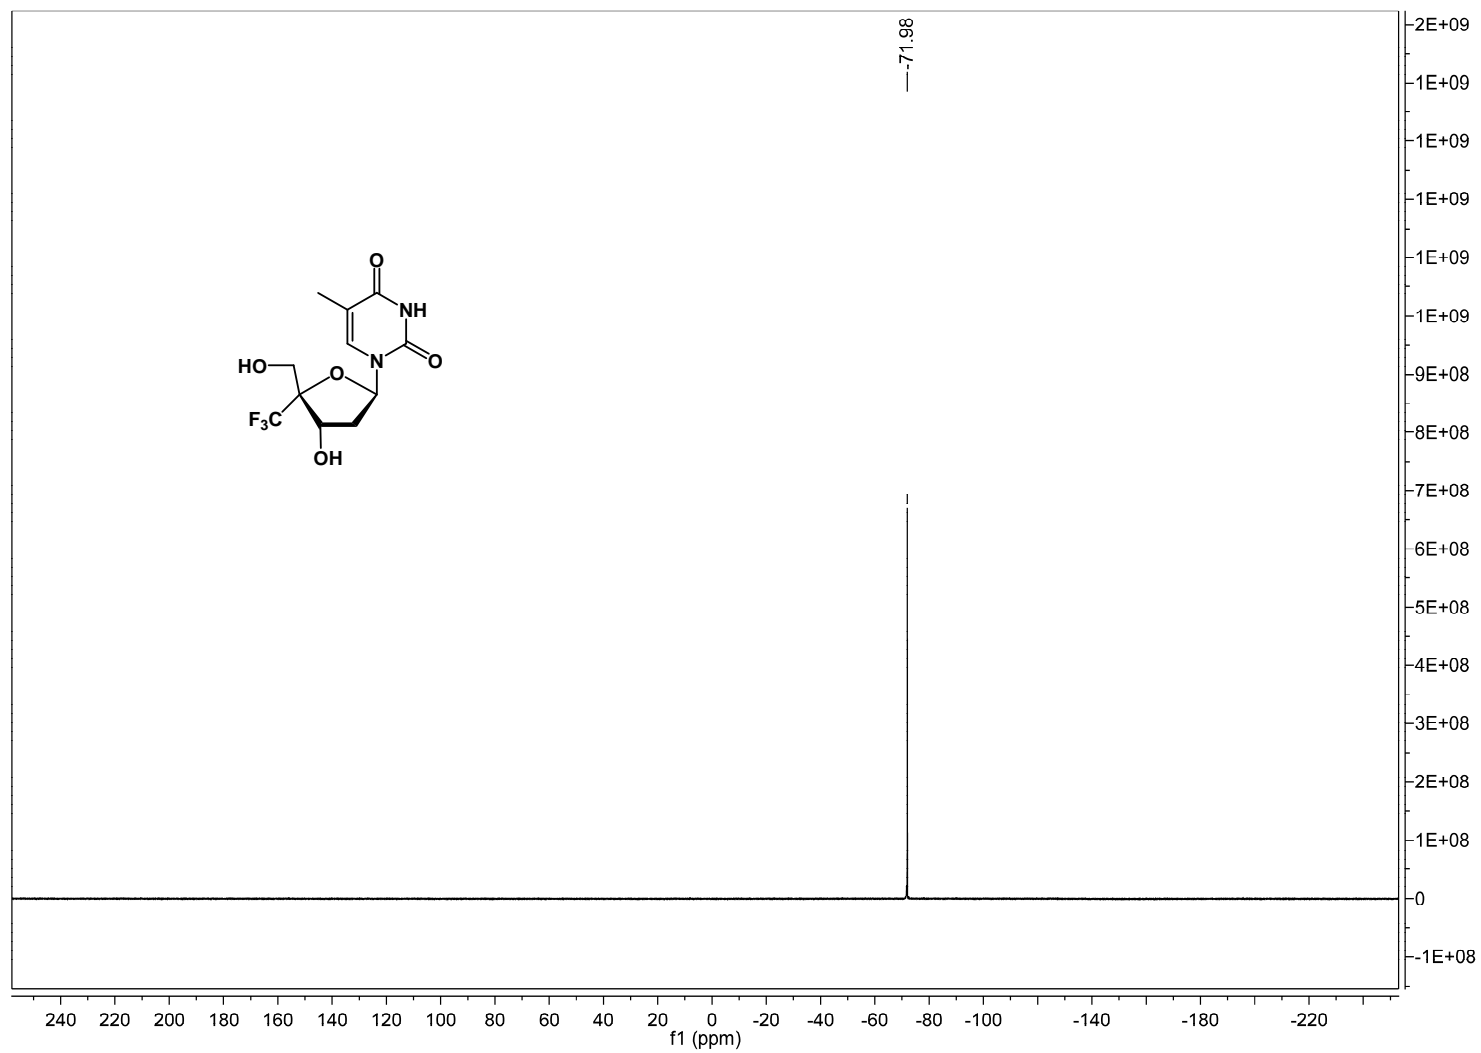

(R) COSY NMR spectrum of 6 (in  $d_6$ -DMSO):

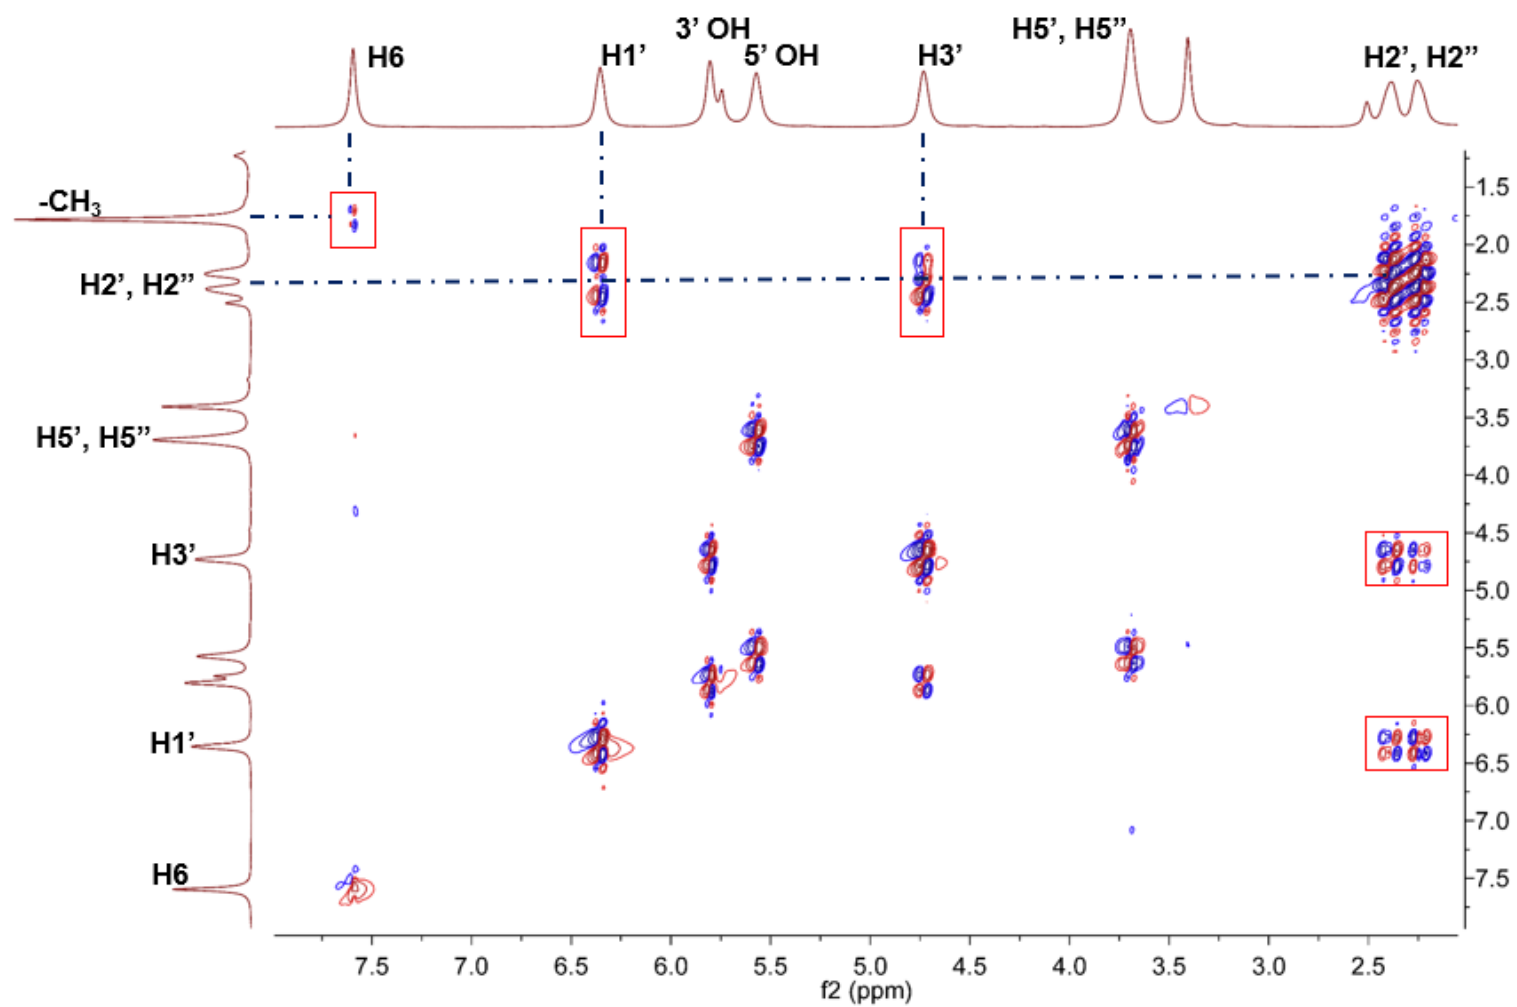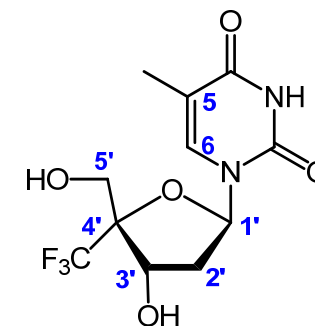

(S) NOESY NMR spectrum of 6 (in  $d_6$ -DMSO):

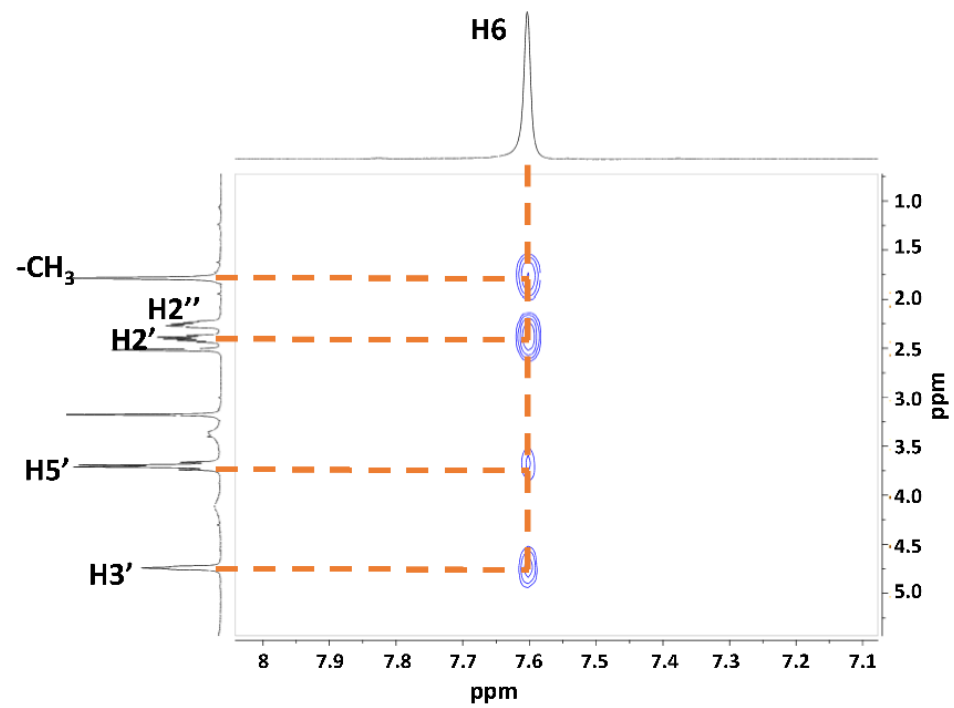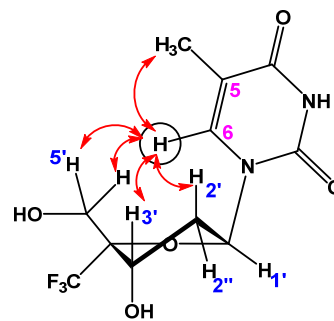

(T)  $^1\text{H}$  NMR spectrum of 7 (in  $\text{CDCl}_3$ ):

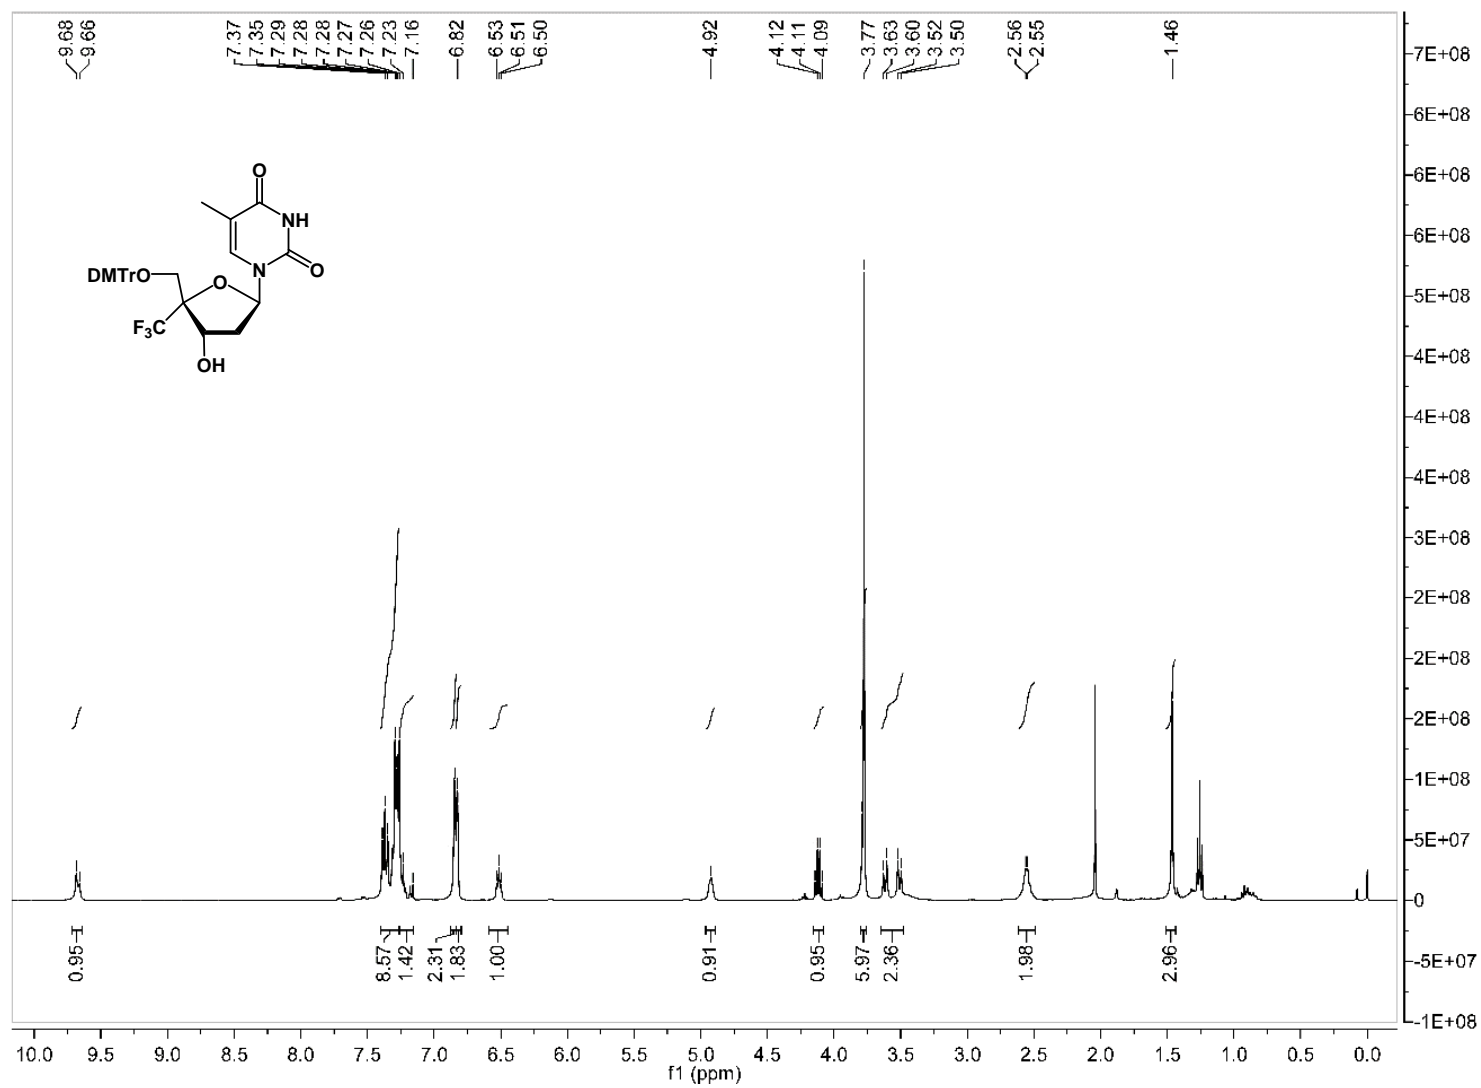

(U)  $^{13}\text{C}$  NMR spectrum of 7 (in  $\text{CDCl}_3$ ):

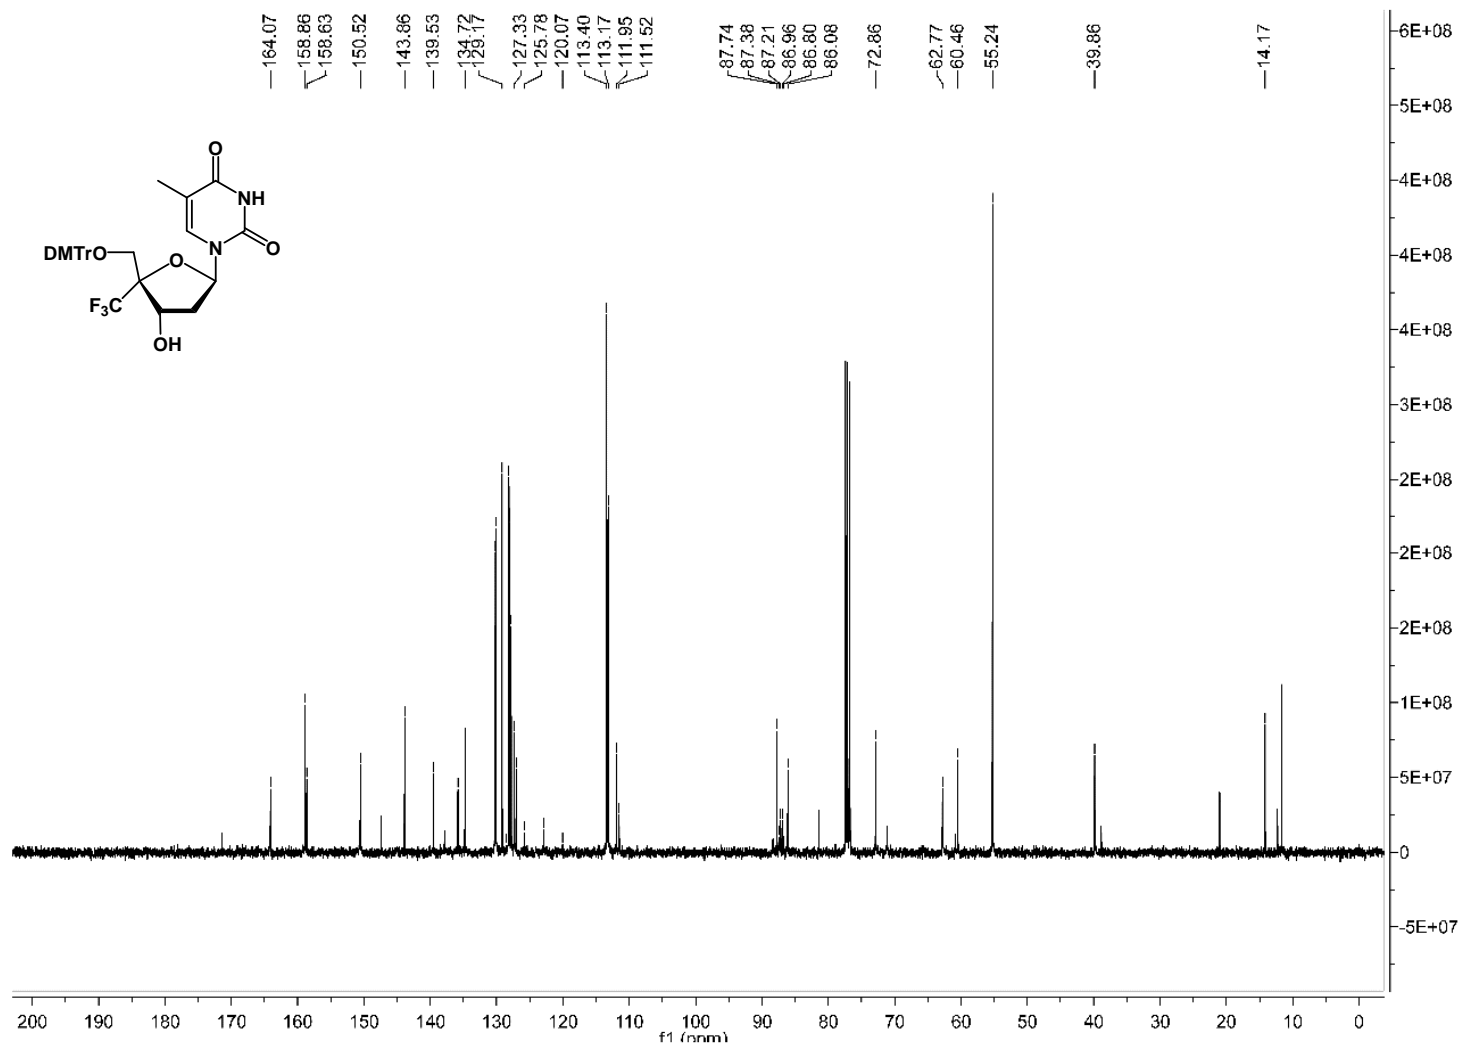



(V)  $^1\text{H}$  NMR spectrum of **8** (in  $\text{CDCl}_3$ ):

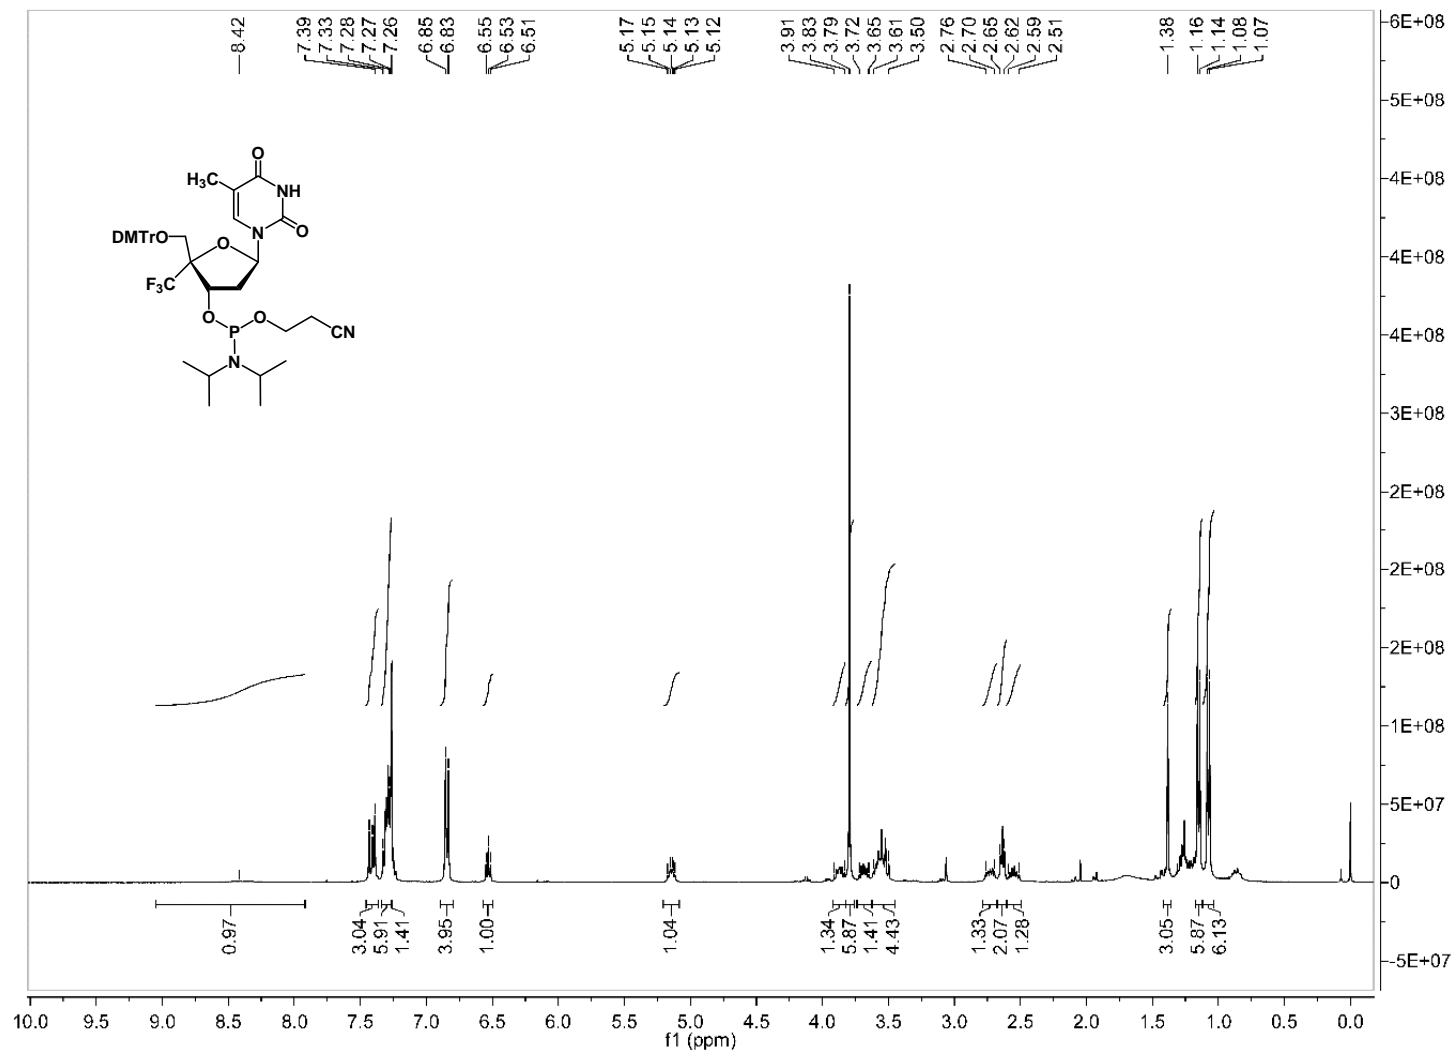

(W)  $^{31}\text{P}$  NMR spectrum of **8** (in  $\text{CDCl}_3$ ):

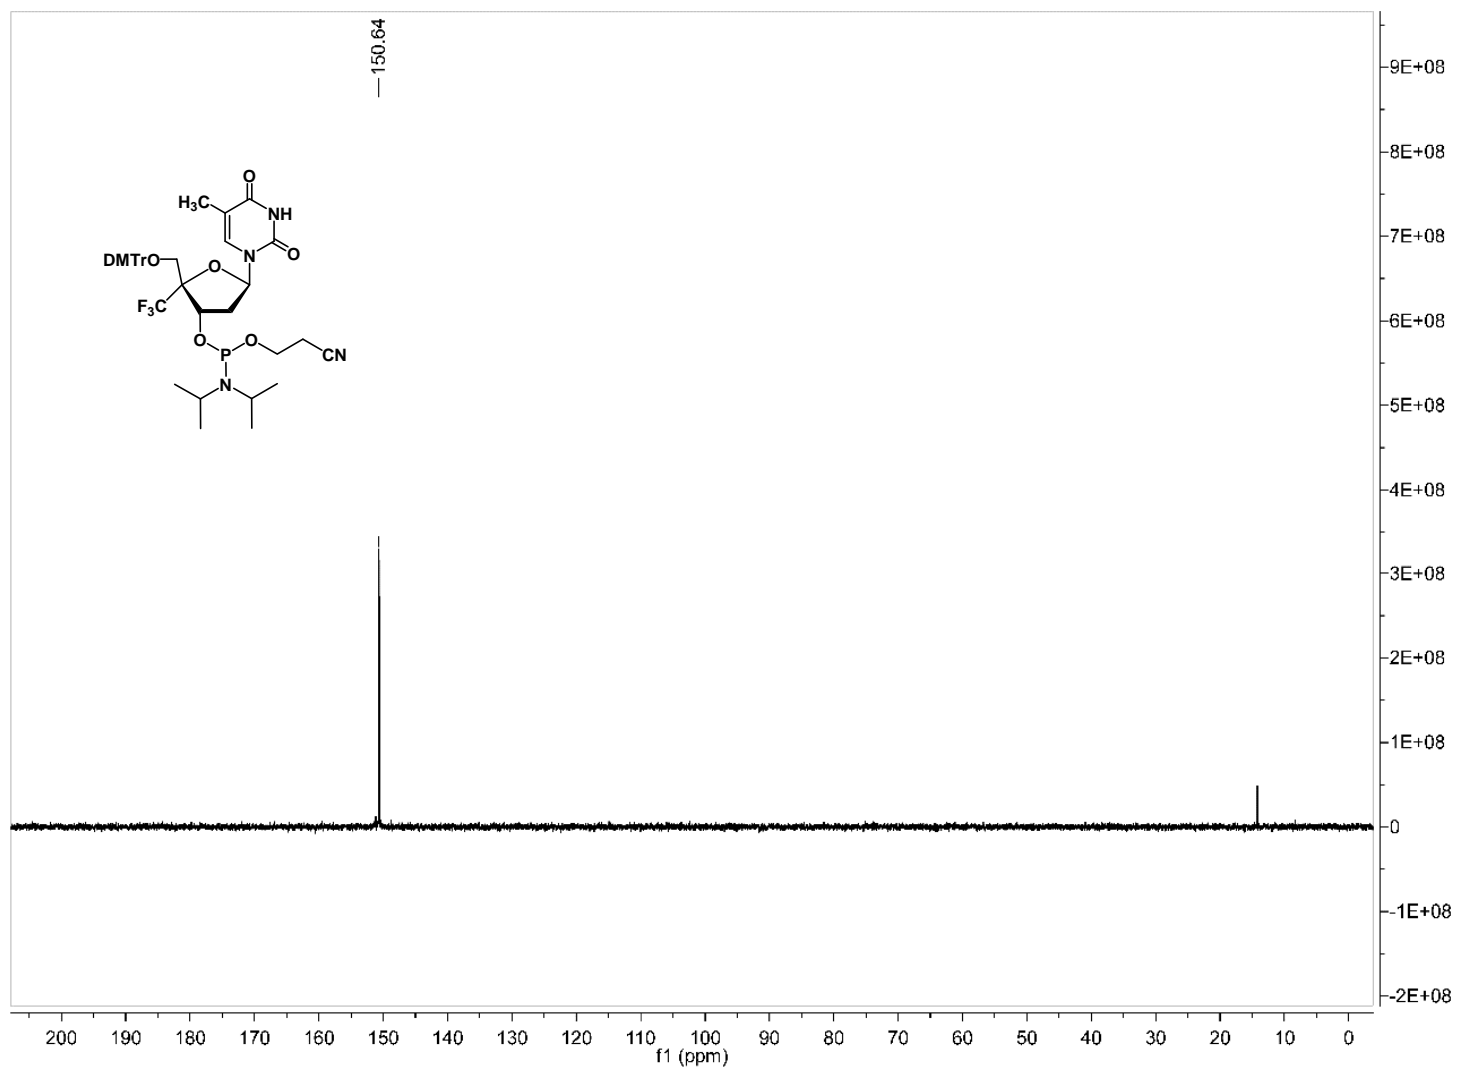

(X) 2D TOSCY NMR of oligo 5'-d[TT<sup>4'-CF3</sup>A] (600 MHz, 0.6 mM of oligo in 10% D<sub>2</sub>O/H<sub>2</sub>O).

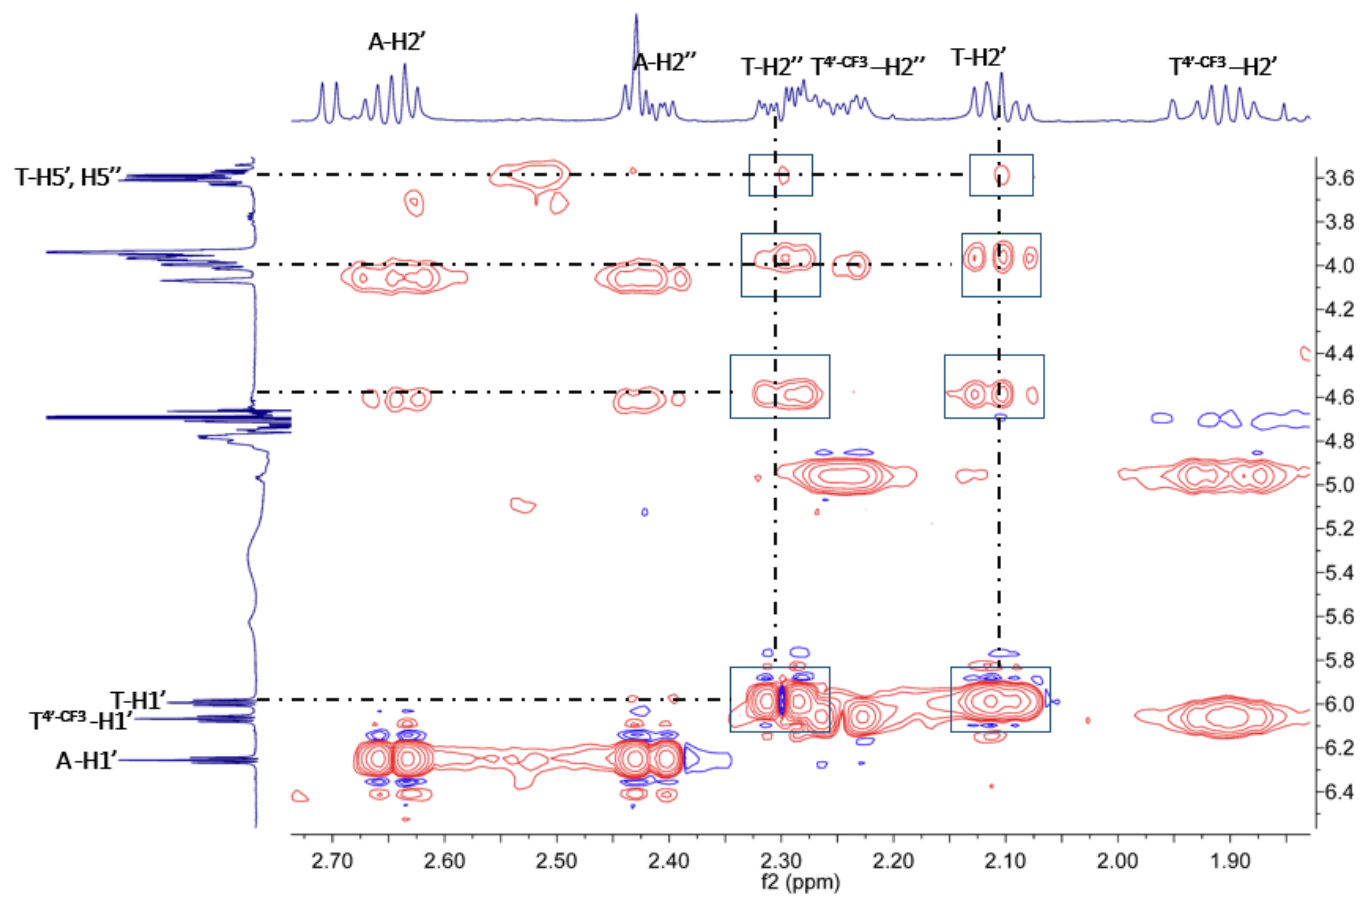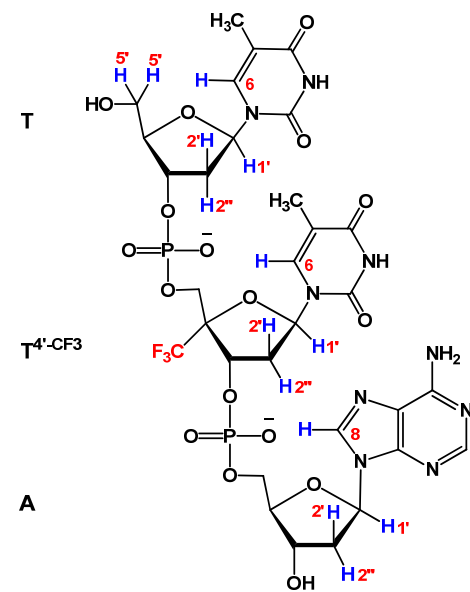

(Y) 2D NOESY NMR of oligo 5'-d[TT<sup>4'-CF3</sup>A] (600 MHz, 0.6 mM of oligo in 10% D<sub>2</sub>O/H<sub>2</sub>O).

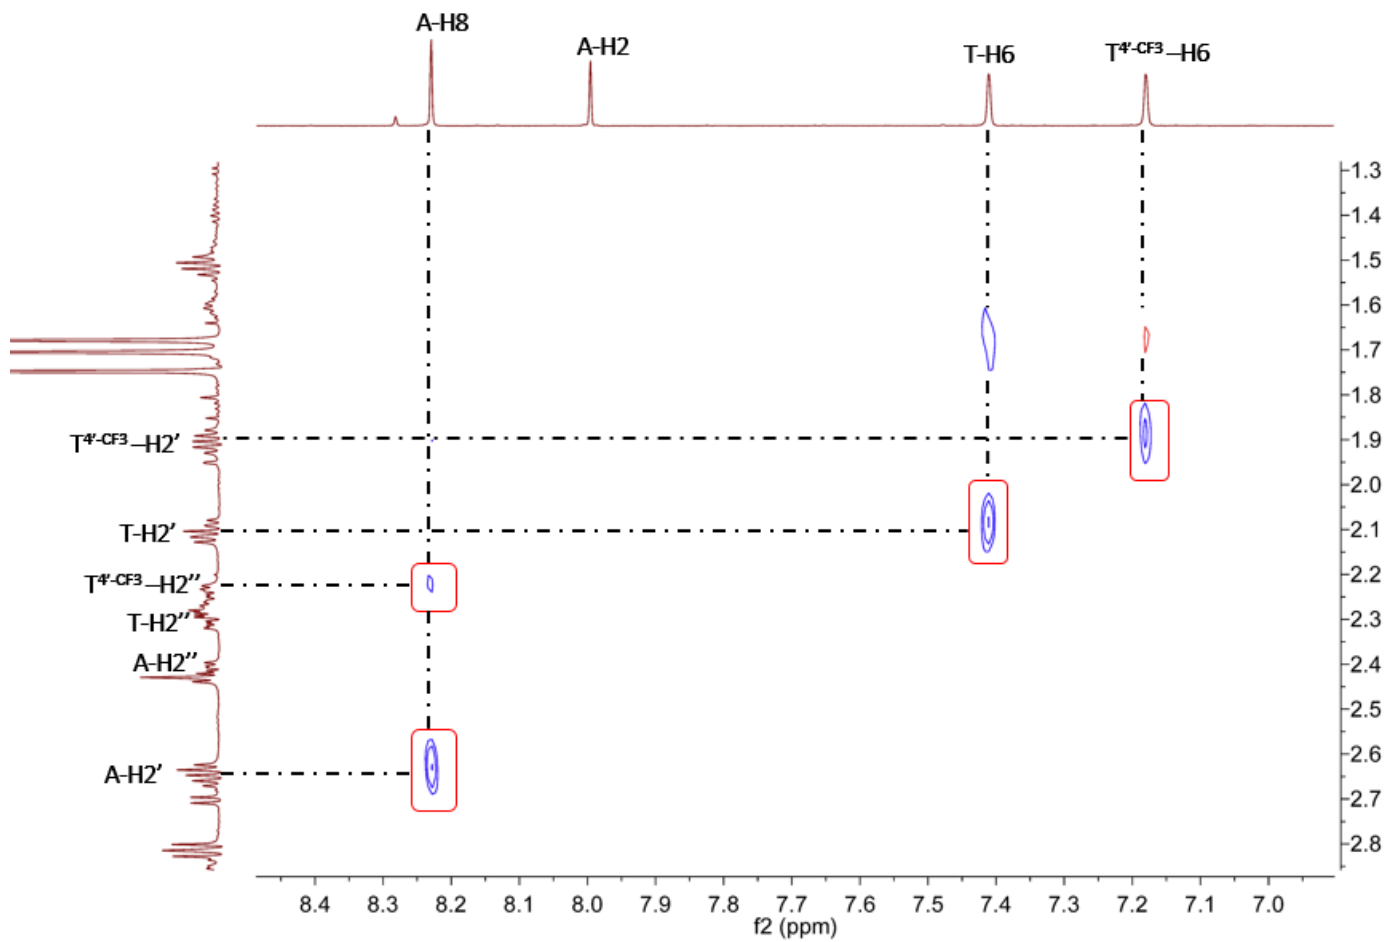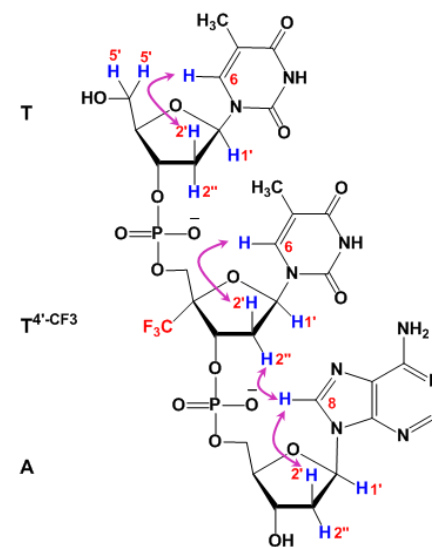

Figure S2. MS spectra of oligos.

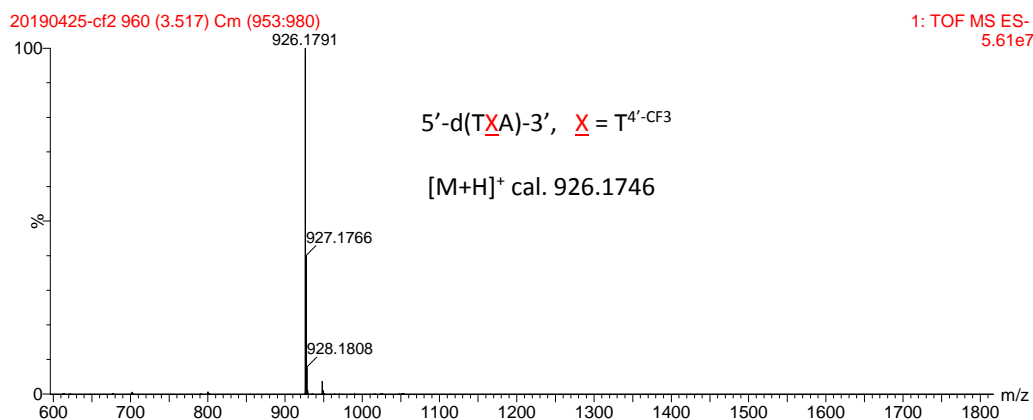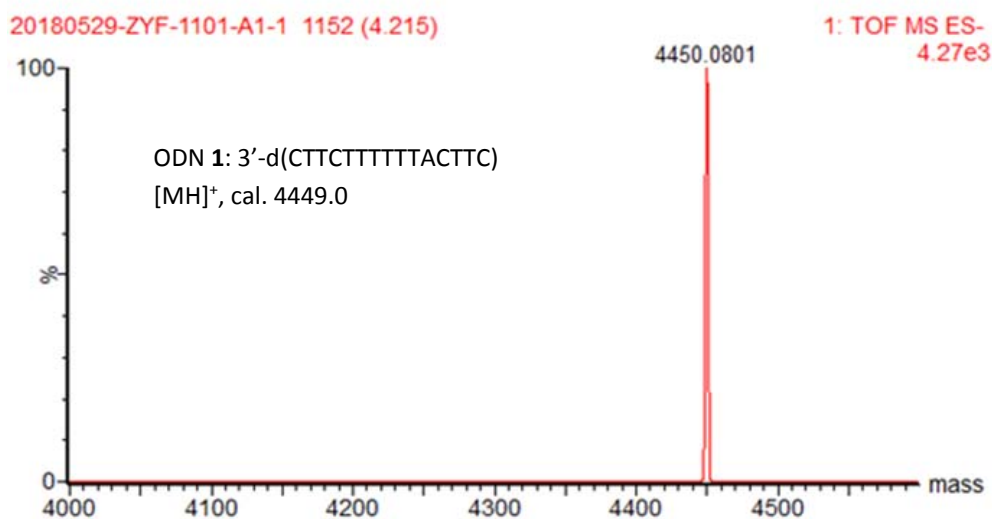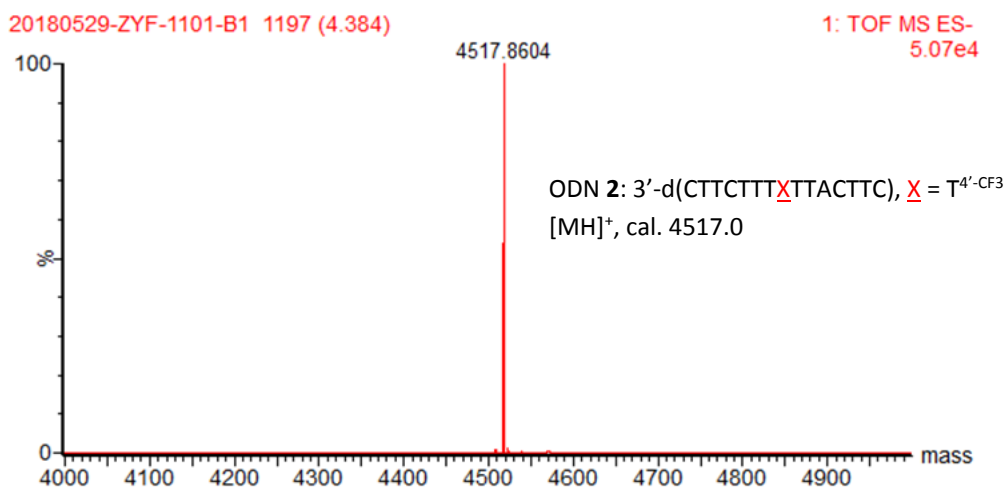

20180529-ZYF-1101-C1 1229 (4.497)

1: TOF MS ES-  
1.05e5

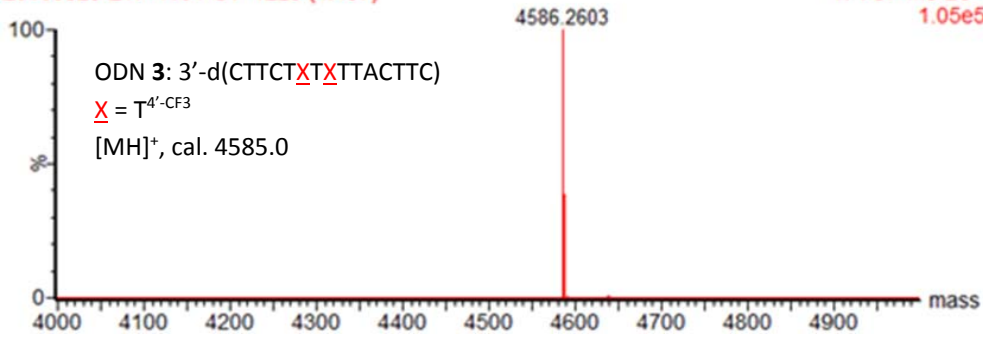

20180529-ZYF-1101-D1-2 1272 (4.653)

1: TOF MS ES-  
5.94e5

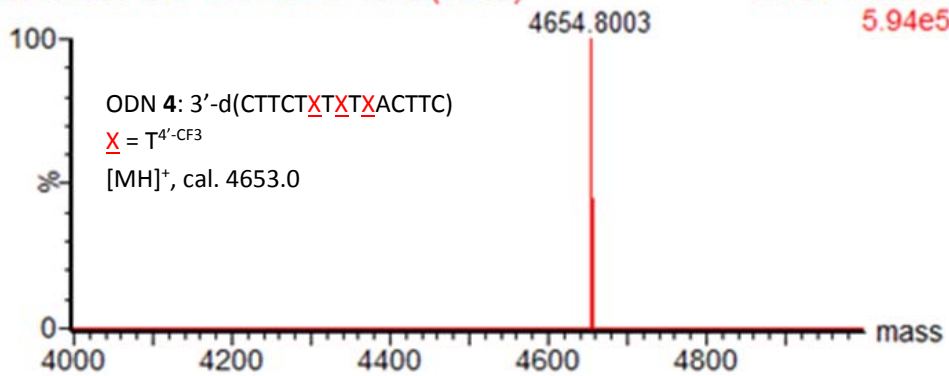

20180529-ZYF-1101-E1 1309 (4.790)

1: TOF MS ES-  
5.63e4

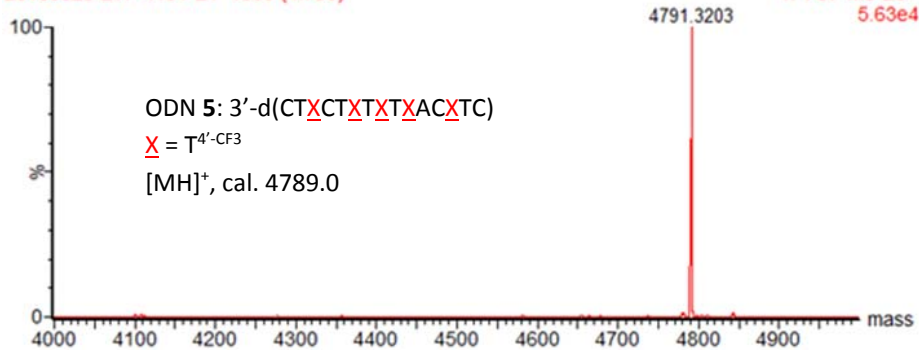

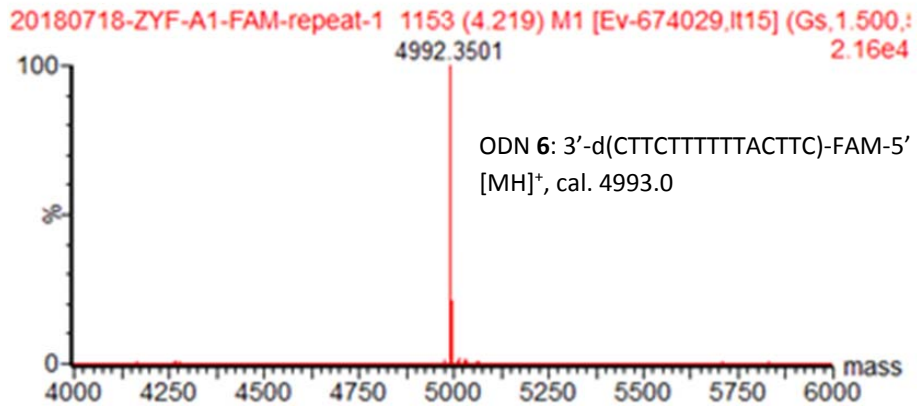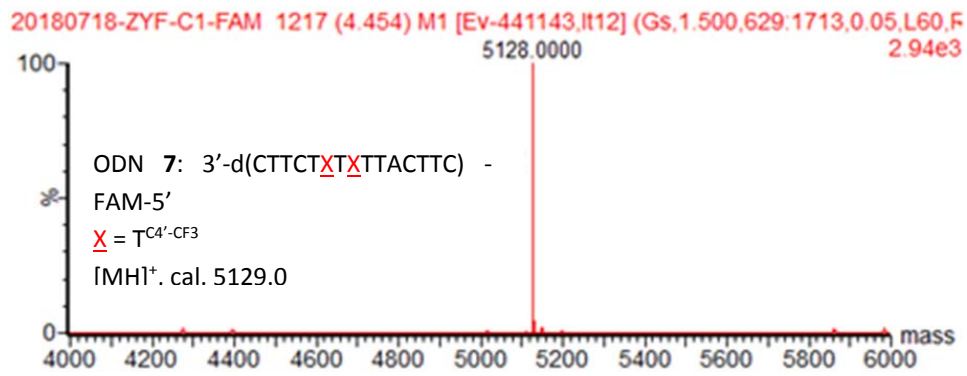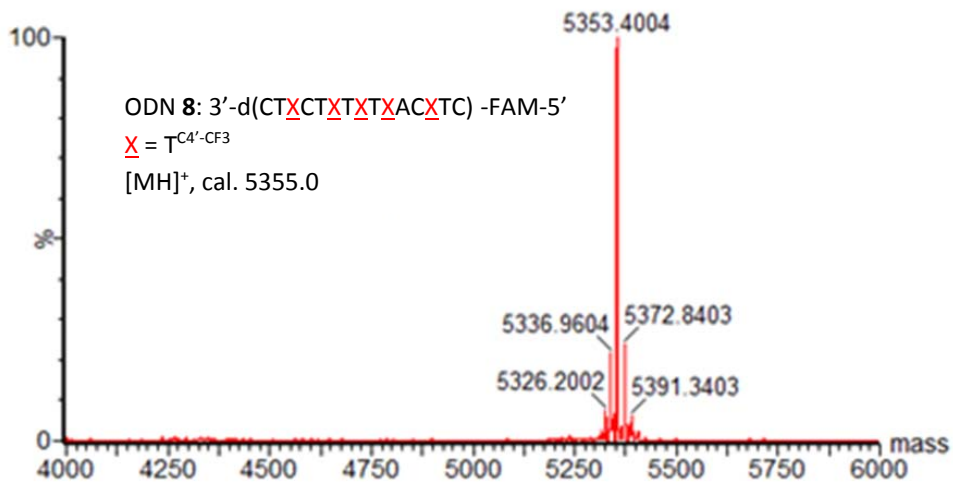

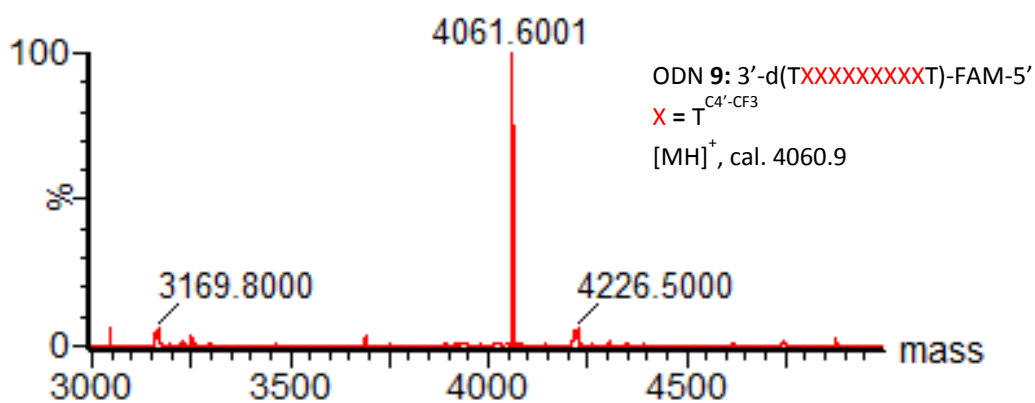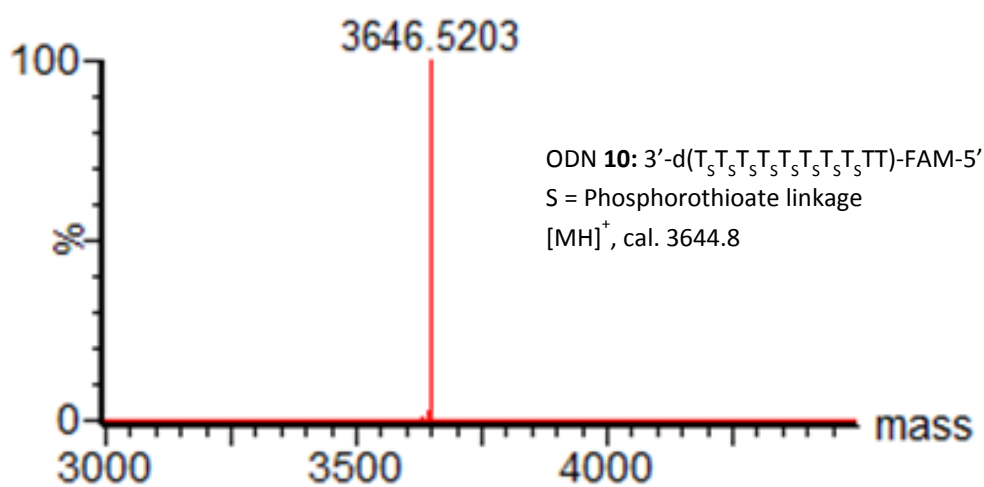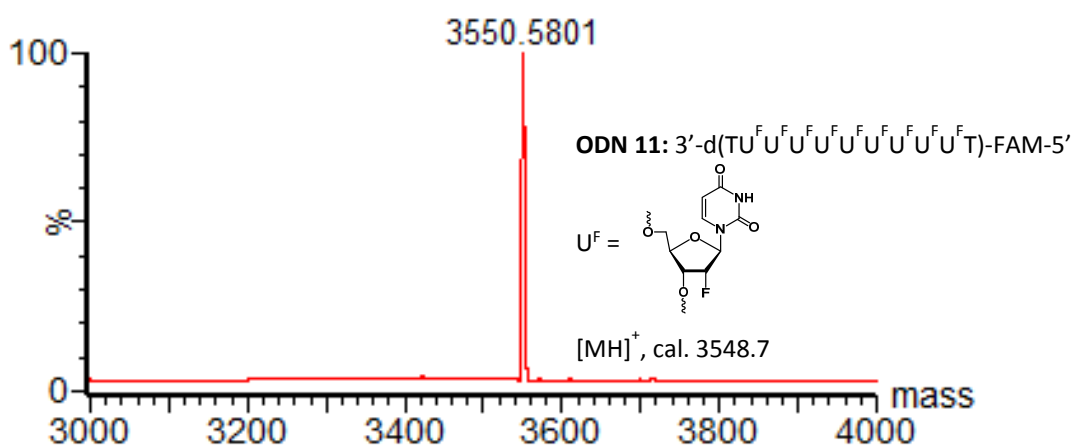



(A)

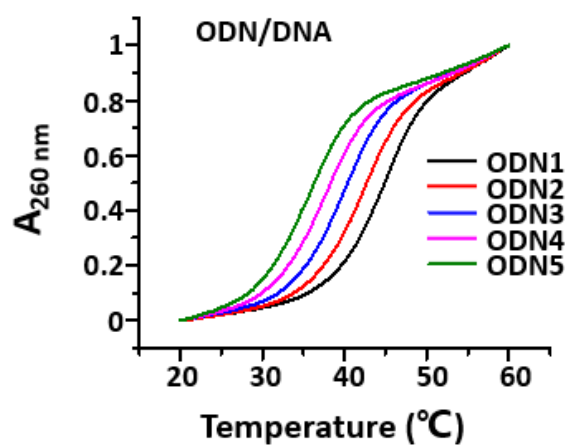

(B)

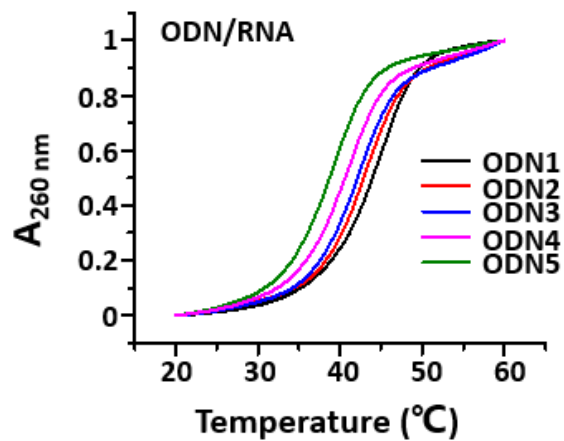

Figure S3. Melting Curves of ODN/DNA and ODN/RNA duplexes.

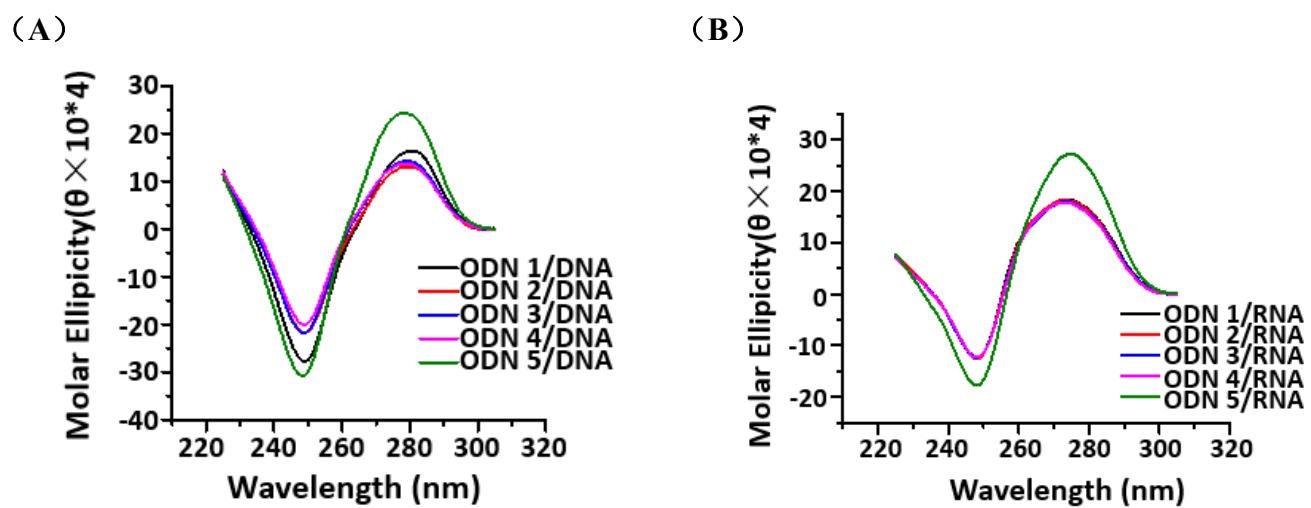

Figure S4. Circular dichroism spectroscopy of ODNs/DNA duplexes and ODNs/RNA duplexes.

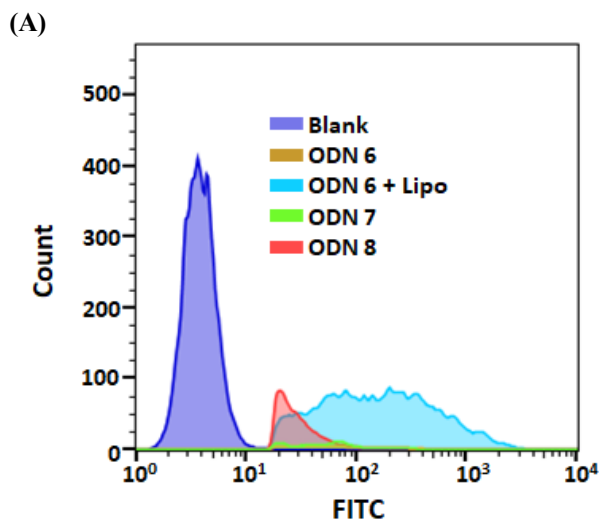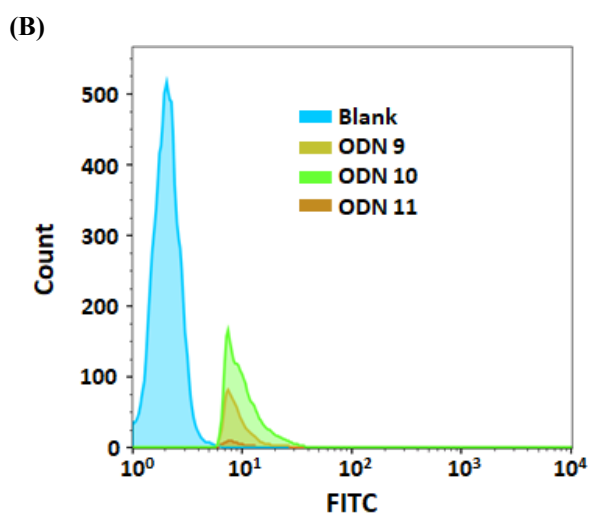

Figure S5. Flow Cytometry analysis of cell permeability of ODNs.
